1 **Title:** Brain-wide connectivity map of mouse thermosensory cortices

2

3 **Authors:** Phillip Bokini<sup>1</sup>, Clarissa J. Whitmire<sup>1</sup>, Tobias M. Leva<sup>1</sup> and James F.A. Poulet<sup>1\*</sup>

4

5 **Affiliations:** <sup>1</sup>Max Delbrück Center for Molecular Medicine in the Helmholtz Association (MDC),  
6 and Neuroscience Research Center, Charité-Universitätsmedizin, Berlin, Germany

7

8 **Corresponding Author:** James Poulet; Max Delbrück Center for Molecular Medicine (MDC),  
9 Robert-Rössle-Str. 10, 10392 Berlin-Buch, Germany; Telephone: +49 (0)30 940 602334; Email:

10 [james.poulet@mdc-berlin.de](mailto:james.poulet@mdc-berlin.de); Website: <http://www.mdc-berlin.de/poulet>

11

12 **Keywords:** somatosensory, insular cortex, somatosensory cortex, thermosensation, whole-brain  
13 connectivity, parallel pathway

14

15 **Manuscript:** 49 pages including Abstract, Main text, Methods, References and 6 Figures.

16

17 **Supplementary Material:** 22 pages including 7 Figures, 3 Tables and 2 Movies.

## 18 **ABSTRACT**

19 In the thermal system, skin cooling is represented in the primary somatosensory cortex (S1) and  
20 the posterior insular cortex (pIC). Whether S1 and pIC are nodes in anatomically separated or  
21 overlapping thermal sensorimotor pathways is unclear, as the brain-wide connectivity of the  
22 thermal system has not been mapped. We address this using functionally targeted, dual injections  
23 of anterograde viruses or retrograde tracers into S1 and pIC. Our data show that inputs to S1 and  
24 pIC originate from two non-overlapping populations, supporting the existence of parallel input  
25 pathways. While outputs from S1 and pIC were more widespread and share a number of cortical  
26 and subcortical regions, within target structures axonal projections were often separable. We  
27 observed a high degree of reciprocal connectivity with thalamic and cortical regions from both S1  
28 and pIC, but output to the mid- and hind- brain was unidirectional. Notably, pIC showed exclusive  
29 connectivity with regions associated with thermal processing. Together, these data indicate that  
30 cutaneous thermal information is routed to the cortex via multiple, parallel streams of information  
31 which are forwarded to overlapping downstream regions for the binding of complex  
32 somatosensory percepts and integration with ongoing behavior.

## 33 INTRODUCTION

34 A fundamental feature of mammalian sensory pathways is that the same modality is represented  
35 in multiple cortical areas. As the circuitry of different cortical sensory regions is typically studied  
36 independently, the neuronal wiring principles of multiple sensory representations is unclear.  
37 Different cortical sensory representations could be separate nodes in anatomically segregated,  
38 'parallel' neural pathways (Fig. 1a - left). Alternatively, the same presynaptic nuclei could provide  
39 copies of sensory information to widespread cortical regions for forwarding to overlapping brain  
40 areas in a 'mixed' connectivity model (Fig. 1a - right). The thermal system is an ideal model system  
41 to address this question as both the primary somatosensory cortex (S1) (Hellon et al., 1973;  
42 Tsuboi et al., 1993; Milenkovic et al., 2014) and the posterior insular cortex (pIC) (Penfield and  
43 Faulk, 1955; Craig et al., 2000; Beukema et al., 2018; Vestergaard et al., 2022) are involved in  
44 thermal processing. Moreover, our recent work has shown that both S1 and pIC have a rich  
45 cellular representation of cooling and powerful role on thermal perception (Milenkovic et al., 2014;  
46 Vestergaard et al., 2022). However, despite the importance of temperature for somatosensation,  
47 there is no comprehensive connectivity map of the mouse thermal system (Bokiniec et al., 2018).

48 The connectivity of forelimb S1 and IC has been examined independently in prior studies  
49 (Guldin and Markowitsch, 1983; Cechetto and Saper, 1987; McDonald and Jackson, 1987; Allen  
50 et al., 1991; Shi and Cassell, 1998a, 1998b; Kimura et al., 2010; Maffei et al., 2012; Oh et al.,  
51 2014; Zakiewicz et al., 2014; Zingg et al., 2014; Gehrlach et al., 2020). Independent tracing allows  
52 a comparison of large-scale wiring differences between two regions, but prohibits a  
53 comprehensive examination of subregion and cell-specific connectivity. Moreover, most prior  
54 work has used stereotactic targeting for tracer injections. Because blood vessel patterns as well  
55 as brain and skull sizes vary from mouse to mouse, it is challenging to determine whether  
56 stereotactically-targeted cortical regions correspond to specific sensory representations.

57           Here we performed functional widefield calcium imaging to target tracer injections to the  
58 thermal representations in forelimb S1 and pIC. To allow a direct comparison of inputs and output  
59 wiring of S1 and pIC, both regions were injected in the same mouse. We used anterograde adeno-  
60 associated viruses (AAV) to trace axonal projections (Viswanathan et al., 2015) or cholera toxin  
61 subunit B (CTb) for retrograde tracing of cellular resolution inputs. Brains were then sliced and  
62 imaged from hindbrain to frontal cortex, and the brain-wide input and output connectivity from  
63 forelimb S1 and pIC were quantified using automated cell counting and axon density estimates.  
64 Our study provides a comprehensive whole-brain connectivity map of two major thermal cortical  
65 representations, and suggests that there are two independent thermal pathways routed via S1  
66 and pIC.

## 67 **MATERIALS AND METHODS**

### 68 **Mice**

69 All experiments were approved by the Berlin Landesamt für Gesundheit und Soziales (LAGeSo),  
70 and carried out in accordance with European animal welfare law. Adult (n = 10), male and female  
71 GP4.3 (C57BL/6J-Tg(Thy1-GCaMP6s)GP4.3Dkim/) mice from Jackson Laboratories  
72 (JAX#024275, Chen et al., 2013) were used. Mice were housed under 12-hour light/dark cycles  
73 and provided with *ad libitum* food and water.

### 74 **Surgery**

75 Mice were anaesthetized with isoflurane in oxygen (3-4 % initiation, and 1-1.5 % maintenance,  
76 CP-Pharma) and injected with Metamizol for post-operative pain management (200 mg/kg, s.c.,  
77 Zentiva). Anaesthetized mice were then placed in a nose clamp and eye gel (Vidisic, Bausch +  
78 Lomb) was applied to both eyes. Core temperature of mice was maintained by a homoeothermic  
79 heating blanket (FHC). The right forepaw was tethered onto a Peltier element (8x8 mm, Digi-Key  
80 Electronics) for thermal stimulation of the paw. The left primary somatosensory cortex forelimb  
81 (S1) was exposed by removing all the skin on the parietal bone and locating Bregma and Lambda  
82 suture landmarks. The left posterior insular cortex (pIC) was exposed by rotating the head ~30-  
83 40 degrees to the right and by displacement of the left temporalis muscle from the temporal bone.  
84 The rhinal vein, middle cerebral artery and zygomatic bone were used as anatomical landmarks  
85 for pIC (Vestergaard et al., 2022). The skull overlying forelimb S1 and pIC was thinned with a  
86 dental drill (head-diameter: 10 mm, Komet Dental) to improve image quality.

### 87 **In vivo imaging**

88 Widefield calcium imaging was used to identify thermal locations in S1 and pIC as previously  
89 described (Vestergaard et al., 2022). Briefly, images were acquired by a sCMOS camera

90 (Hamamatsu ORCA-Flash4.0 LT) via an epifluorescent stereomicroscope (Excitation: 470/40  
91 nm, Emission: 525/50 nm, Leica MZ10 F) equipped with a CoolLED pE-300 LED Microscope  
92 illuminator, at a rate of 20 Hz with 35 ms exposure time. Thermal stimuli were delivered to the  
93 right forepaw via a feedback-controlled Peltier element stimulator (custom made device, ESYS  
94 GmbH Berlin). Cooling stimuli were 10 or 14 °C drop from 32 °C baseline with a duration of 2 s  
95 and onset ramp of 20 °C / s. The location of pIC was further confirmed by identifying the  
96 surrounding auditory cortex, and, in some cases, the insular auditory field (see: Rodgers et al.,  
97 2008; Sawatari et al., 2011; Gogolla et al., 2014) using an 8 kHz, ~65 dB, 1 s acoustic sound via  
98 a loudspeaker (Visaton). Mice received a minimum of 3 stimulation trials to confirm functional  
99 responses. Craniotomies (~1x1 mm) were then performed over the thermally responsive regions  
100 in S1 and pIC.

#### 101 **Tracer and virus injections**

102 Custom written code (Python version 3.7, Python Software Foundation) was used to identify the  
103 center point of the widefield response during the imaging session. The center-of-mass was  
104 computed from all pixels above 80 % of the peak fluorescence in the trial-averaged responses.  
105 Next, glass pipettes (~ 20 µm diameter) containing cholera toxin subunit b (Ctb), for input  
106 mapping, or adeno-associated viruses (AAV), for axonal output mapping, were inserted into the  
107 center of the thermal response, normal to the cortical surface. Two 50-75 nL injections (100  
108 nL/min) were made, one at 700 µm and a second at 400 µm depth from the pial surface, using an  
109 oil hydraulic manipulator (One-axis oil hydraulic micromanipulator, Narishige). Pipettes were left  
110 in place for 5-10 min following each injection and then slowly retracted. S1 was injected with either  
111 Ctb Alexa Fluor 647 (Ctb-647, 0.5 % in PBS, Thermo Fisher) or AAV-smFP-myc  
112 (pAAV.CAG.GFPsm-myc.WPRE.SV40,  $7.17 \times 10^{11}$  vg/ml), and pIC with either Ctb Alexa Fluor  
113 555 (Ctb-555, 0.5 % in PBS, Thermo Fisher) or AAV-smFP-FLAG (pAAV.CAG.Ruby2sm-

114 Flag.WPRE.SV40,  $1.58 \times 10^{12}$  vg/ml). To visualize AAV cortical injection sites, AAVs were mixed  
115 with a low concentration of Ctb Alexa Fluor 488 (0.05 % v/v, 0.5 % in PBS, Thermo Fisher).  
116 To confirm the location of the injection site, we imaged the fluorescence tracer 10 min post  
117 injection while on the imaging setup with the same angle, orientation and field-of-view using either  
118 orange light (Excitation: 575/70 nm, Emission: 640/50 nm) or a green LED light at 20 Hz, 35 ms  
119 exposure time. A small layer of bone wax was then placed over both craniotomies to prevent  
120 tissue damage. The exposed skull was then covered with dental cement (Paladur) and mice  
121 placed onto a 37 °C heating blanket and finally returned to their home cage. Drinking water was  
122 supplemented with Metamizol (200 mg/kg, Ratiopharm) for post-operative pain management for  
123 2-3 days.

## 124 **Histology**

125 Five to seven days after injection of Ctb, or three to four weeks after injection of AAV, mice were  
126 anaesthetized with an overdose of ketamine/xylazine (1200 mg/kg ketamine, 500 mg/kg xylazine,  
127 i.p., WDT eG and Bayer, respectively) and transcardially perfused with 50 mL ice-cold PBS (0.1  
128 M) followed by 50 mL of ice-cold 4 % PFA. Brains were removed and post-fixed overnight in PFA  
129 at 4 °C. Whole brains were cut into coronal sections (50  $\mu$ m) using a vibrating microtome (Leica  
130 VT1000S) and every 4<sup>th</sup> section was collected. Sections containing Ctb were directly mounted  
131 onto glass slides using DAPI Fluoromount-G (Southern Biotech) mounting medium.

132 Sections containing AAVs were stored for further immunohistochemical processing as described  
133 previously (Bokiniec et al., 2017). Briefly, free-floating sections were first washed in PBS  
134 containing 0.3 % Triton X-100 (3 x 10 min, RT) and then blocked with 5 % normal goat serum in  
135 the above wash solution for 60 min at RT. Sections were incubated in primary antibodies (diluted  
136 in the blocking solution, see Table 1) against myc (rabbit c-Myc, 1:1000, Sigma-Aldrich, C3956,  
137 RRID: AB\_439680) and FLAG (mouse-FLAG, 1:1000, Sigma-Aldrich, F1804, RRID: AB\_262044)

138 for 48 h at 4 °C. Sections were washed with PBS and then incubated in PBS containing 5 %  
139 normal goat serum with fluorescent conjugated secondary antibodies (Alexa Fluor 555-  
140 conjugated goat anti-mouse IgG, 1:500, Thermo Fisher, A21422, RRID: AB\_2535844, and Alexa  
141 Fluor 647-conjugated donkey anti-rabbit IgG, 1:500, Thermo Fisher, A31573, RRID:  
142 AB\_2536183) overnight at 4 °C. Brain sections were then washed and mounted onto glass slides  
143 using DAPI Fluoromount-G (Southern Biotech) mounting medium.

144 Brain sections were visualized with a Zeiss upright microscope (Axio Imager A.2) using the ZEN  
145 Imaging software. Images were acquired using a 10x/0.45NA objective. Exposure times for AAV  
146 or Ctb were kept the same across mice.

## 147 **Histological image processing**

### 148 *Atlas registration*

149 Images were first separated by fluorophore, organized sequentially, rotated to the correct  
150 orientation, and down sampled (20 % from original) using ZEN Imaging software. Using the  
151 ImageJ plugin Fiji (Schindelin et al., 2012), a 1 mm boundary in the rostral-caudal, medial-lateral,  
152 and dorsal-ventral axis was masked over the center of the injection sites and excluded from further  
153 analysis. All slices were registered to the Allen Brain Atlas Common Coordinate Framework v3  
154 (ABA) using the QUICKNii software package (Puchades et al., 2019). Due to possible section  
155 distortion along the dorsal-ventral, rostral-caudal or medial-lateral axes as a consequence of  
156 histological processing, images were adjusted using QUICKNii. Sections were contrast adjusted  
157 in QUICKNii to allow clear matching of anatomical landmarks from the slice to the atlas. Following  
158 complete registration of the sections to the ABA, the corresponding RGB atlas images were  
159 exported from the QUICKNii software.

### 160 *Signal detection*



161 Cell soma were identified using a modified version of AIDAhisto (Pallast et al., 2019) that allows  
162 interaction with the ABA RGB atlas (MATLAB Version R2018b, The MathWorks Inc.). Images  
163 were filtered using the Leung-Malik Filter Bank (Leung and Malik, 2001) to detect non-circular  
164 cells with a size between 8 - 10 pixels (corresponding to 20 - 25  $\mu\text{m}$  in the down sampled image).  
165 A single threshold for cell detection was determined empirically and was applied to all the  
166 datasets. To reduce the identification of false positive cells, the XY cell positions were referenced  
167 to a corresponding binarized DAPI nuclei image using the  $k$ -Nearest-Neighbor classification  
168 where  $k = 1$ , within a radius of 1.5 pixels. Detected cells were then manually checked to their  
169 corresponding micrographs and any remaining false positive cells were discarded. ABA RGB  
170 coordinates were then obtained from matching the new XY cell positions onto the corresponding  
171 transformed RGB atlas image obtained from the Atlas registration step, and the number of cells  
172 detected in a region were counted.

173 Axonal projection density was analyzed with custom written software (MATLAB Version R2018b,  
174 The MathWorks Inc.). Images were first de-noised using a Wiener-Filter (neighborhood size: 2x2).  
175 Image slice edges that displayed saturated signal due to histological processing were removed  
176 by edge correction from a corresponding binarized DAPI micrograph. Axons were then detected  
177 by convolving the images using the Maximum Response 8 (MR8) Gaussian filter bank (Varma  
178 and Zisserman, 2005) with a width of 3-6 pixels (corresponding to a minimum and maximum axon  
179 width of 1.2  $\mu\text{m}$  and 2.4  $\mu\text{m}$  respectively in the down sampled image). A single threshold for axon  
180 detection was determined empirically based on the length of the detect axon and was applied to  
181 all datasets. The same threshold value was then used for all the corresponding slices and  
182 associated datasets. Images were closely matched to the original micrographs to validate axon  
183 detection as well as identify and manually remove any residual noise pixels that appeared as a  
184 consequence of tissue processing (large, noncontiguous fluorescence). ABA RGB coordinates  
185 were then obtained by matching the XY pixel positions with the corresponding transformed RGB

186 atlas image obtained during the Atlas registration step. Finally, we counted the number of pixels  
187 detected within a region.

### 188 *Visualization*

189 After atlas registration and signal detection, cell soma (input) and axons (output) were projected  
190 onto a 3D reference atlas in Imaris volumetric image software (Version 9.3, Bitplane AG), as  
191 previously described for the rat (Dempsey et al., 2017), using the matrix transformations for the  
192 ABA described in Puchades et al., 2019.

### 193 **Data analysis**

194 Cells and axons were quantified across the whole brain of individual mice using custom-written  
195 Python code. Data were normalized as a fraction of the total amount of inputs or outputs detected  
196 across the brain. Data were grouped into 6 major brain regions (Cortex, Striatum/Pallidum,  
197 Amygdala, Thalamus/Hypothalamus, Midbrain, and Hindbrain) with 70 subregions as determined  
198 from the ABA.

199 S1 and pIC input-output Pearson correlation coefficients were performed for each major brain  
200 region (cortex, thalamus, and amygdala). Independent t-tests for each brain region were  
201 performed on the percentage of whole-brain inputs or outputs between S1 and pIC. All values are  
202 expressed as mean  $\pm$  SEM unless otherwise stated. Statistically significant differences were  
203 considered at  $p < 0.05$ . No statistical methods were used to predetermine sample size.

204 To visualize the spatial alignment of the functional response and the injection location (Figure 1E,  
205 F – left), fluorescence contours were aligned across mice using custom-written Python code as  
206 described previously (Vestergaard et al., 2022). Briefly, the functional fluorescence images (cool-  
207 and sound- trial average evoked responses) and the anatomical fluorescence image (injection  
208 location) were smoothed with a Gaussian filter ( $\sigma = 20$  pixels). The center-of-mass was computed  
209 from all pixels above a threshold of 80 % of peak fluorescence for the trial-averaged cool-evoked

210 responses to identify the center of the cortical region sensitive to temperature. For visualization  
211 of the functional signal, 80<sup>th</sup> percentile contours for each field of view (S1, pIC) from individual  
212 mice were translated to align to the center-of-mass of the fluorescence for thermal stimulation.  
213 For anatomical fluorescence images, the contours were superimposed on the corresponding atlas  
214 section (Figure 1E, F - right).

215 To assess spatial separability of the inputs or outputs within a given subdivision of the brain, the  
216 point cloud of coordinates for inputs (cell soma) and outputs (axon) within each subdivision were  
217 converted into a mesh in the ABA coordinate space. Contralateral coordinates were removed for  
218 this analysis. To minimize sampling limitations due to tissue thickness, the mesh was smoothed  
219 (spatial Gaussian, standard deviation = 100  $\mu\text{m}$ ). The mesh was converted to a binary matrix at  
220 a threshold value of one-tenth of the maximum voxel. A binary matrix was generated for S1 inputs,  
221 S1 outputs, IC inputs, and IC outputs for each brain subdivision. An overlap parameter was  
222 estimated for each subdivision as:

$$223 \quad \text{Overlap}_{input} = \frac{\sum S1_{binary,input} \text{ AND } IC_{binary,input}}{\sum S1_{binary,input} + \sum IC_{binary,input} - \sum S1_{binary,input} \text{ AND } IC_{binary,input}}$$

224

$$225 \quad \text{Overlap}_{output} = \frac{\sum S1_{binary,output} \text{ AND } IC_{binary,output}}{\sum S1_{binary,output} + \sum IC_{binary,output} - \sum S1_{binary,output} \text{ AND } IC_{binary,output}}$$

226 Random data sets (n = 50 per subdivision) were generated under the null hypothesis by shuffling  
227 the labeling of each coordinate included in the analysis for Monte Carlo hypothesis testing. The  
228 p-value was computed as the proportion of simulated overlap coefficients greater than the  
229 observed overlap coefficient.

230 To visualize the spatial overlap, the mesh was not binarized. Instead, a three-dimensional contour  
231 plot was generated (isosurface, Matlab) at the 30<sup>th</sup> quantile of the non-zero voxels. As shown in

232 Figure 6F and 6G, this spatial map was generated across three thalamic nuclei – VPL, POm, and  
233 POt.

234 **Data exclusion**

235 Data were excluded if: (i) the injection site was not located in the cortical functional response; (ii)  
236 post-hoc examination showed that the injection site was mistargeted; (iii) if the retrograde injection  
237 spread into the underlying white matter tract (corpus callosum).

238 **Data and code availability**

239 The datasets and code supporting the current study will be deposited to public repositories.

240

## 241 **RESULTS**

### 242 **Functionally targeted tracer injections into forelimb S1 and pIC**

243 We targeted the forelimb thermosensitive regions of S1 and pIC using wide-field calcium  
244 imaging in anesthetized GP 4.3 mice which express GCaMP6s in cortical excitatory neurons  
245 under the Thy1 promoter (Chen et al., 2013; Dana et al., 2014) (Figure 1B). The skull of the mouse  
246 was thinned and glass coverslips were mounted over the left-hand side of S1 and pIC. A 10 °C  
247 cooling stimulus (32 to 22 °C) was then delivered to the glabrous skin of the right forepaw via a  
248 Peltier element and evoked responses were visualized online (Figure 1C, D, left). The location of  
249 thermal representation in pIC was further confirmed by functional identification of the neighboring  
250 auditory cortex using an auditory tone (Figure 1D, F, left). Next, glass coverslips were removed  
251 and craniotomies drilled over the center of the thermal responses. Anatomical tracers were then  
252 injected into the center of the functional response via a glass micropipette (Figure 1B). Cholera-  
253 toxin b (Ctb) (555 or 647, pseudo colored magenta and green respectively) was used for  
254 retrograding labelling of cell bodies, and AAV2/1 (Ruby2sm-Flag or GFPsm-myc, pseudo-colored  
255 magenta and green respectively) for anterograde labelling of axonal outputs (Figure 1C, D).  
256 Finally, the spatial overlap between the functional response and injection was confirmed with in  
257 vivo imaging (Figure 1E, F, left).

258 Seven days after injection of Ctb, or three to four weeks after injection of AAVs, mice were  
259 perfused and brains removed for histological processing. Analysis of the Ctb and AAV injection  
260 sites in S1 and pIC showed that the spread of the tracers in the injection site was not significantly  
261 different and spread throughout the entire cortical column (medial/lateral pIC:  $565 \pm 40 \mu\text{m}$ , S1:  
262  $653 \pm 77 \mu\text{m}$ ; dorsal/ventral pIC:  $927 \pm 46 \mu\text{m}$ , S1:  $986 \pm 50 \mu\text{m}$ ; rostral/caudal pIC:  $800 \pm 55 \mu\text{m}$ ,  
263 S1:  $800 \pm 43 \mu\text{m}$ ) (Figure 1E, F; Supplementary Figure 1). To identify brain wide input and output  
264 nuclei, fluorescent images of the whole brain were taken and registered to the Allen Brain Atlas

265 Common Coordinate Framework v3 (ABA, Supplementary Figure 3). Regions 1 mm rostral/caudal  
266 and dorsal/ventral (parallel with the cortical region) from the center of the injection site were  
267 excluded from further analysis due to saturation of the fluorescent signal. DAPI staining of cell  
268 bodies and comparative analysis with the Scnn1a-tdTomato mouse line showed that the injections  
269 were targeted to a granular region of pIC (putative layer 4 thickness S1:  $205 \pm 14 \mu\text{m}$  and pIC:  
270  $215 \pm 11 \mu\text{m}$ , Supplementary Figure 2).

271 Whole-brain input-output connectivity maps were created from coronal sections spaced  
272  $200 \mu\text{m}$  apart from  $+1.4 \text{ mm}$  to  $-7.0 \text{ mm}$  relative to bregma. Analysis of the olfactory bulbs, frontal  
273 cortical regions and the cerebellum were excluded. As the number of labelled neurons (S1:  $5147$   
274  $\pm 800$ , pIC:  $7737 \pm 330$  cells) and axons (S1:  $2,323,883 \pm 245,388$ , pIC:  $1,862,505 \pm 286,668$   
275 pixels) varied across mice, the input and output values were normalized as a fraction of the total  
276 amount of input cell bodies/axonal outputs detected across the entire brain.

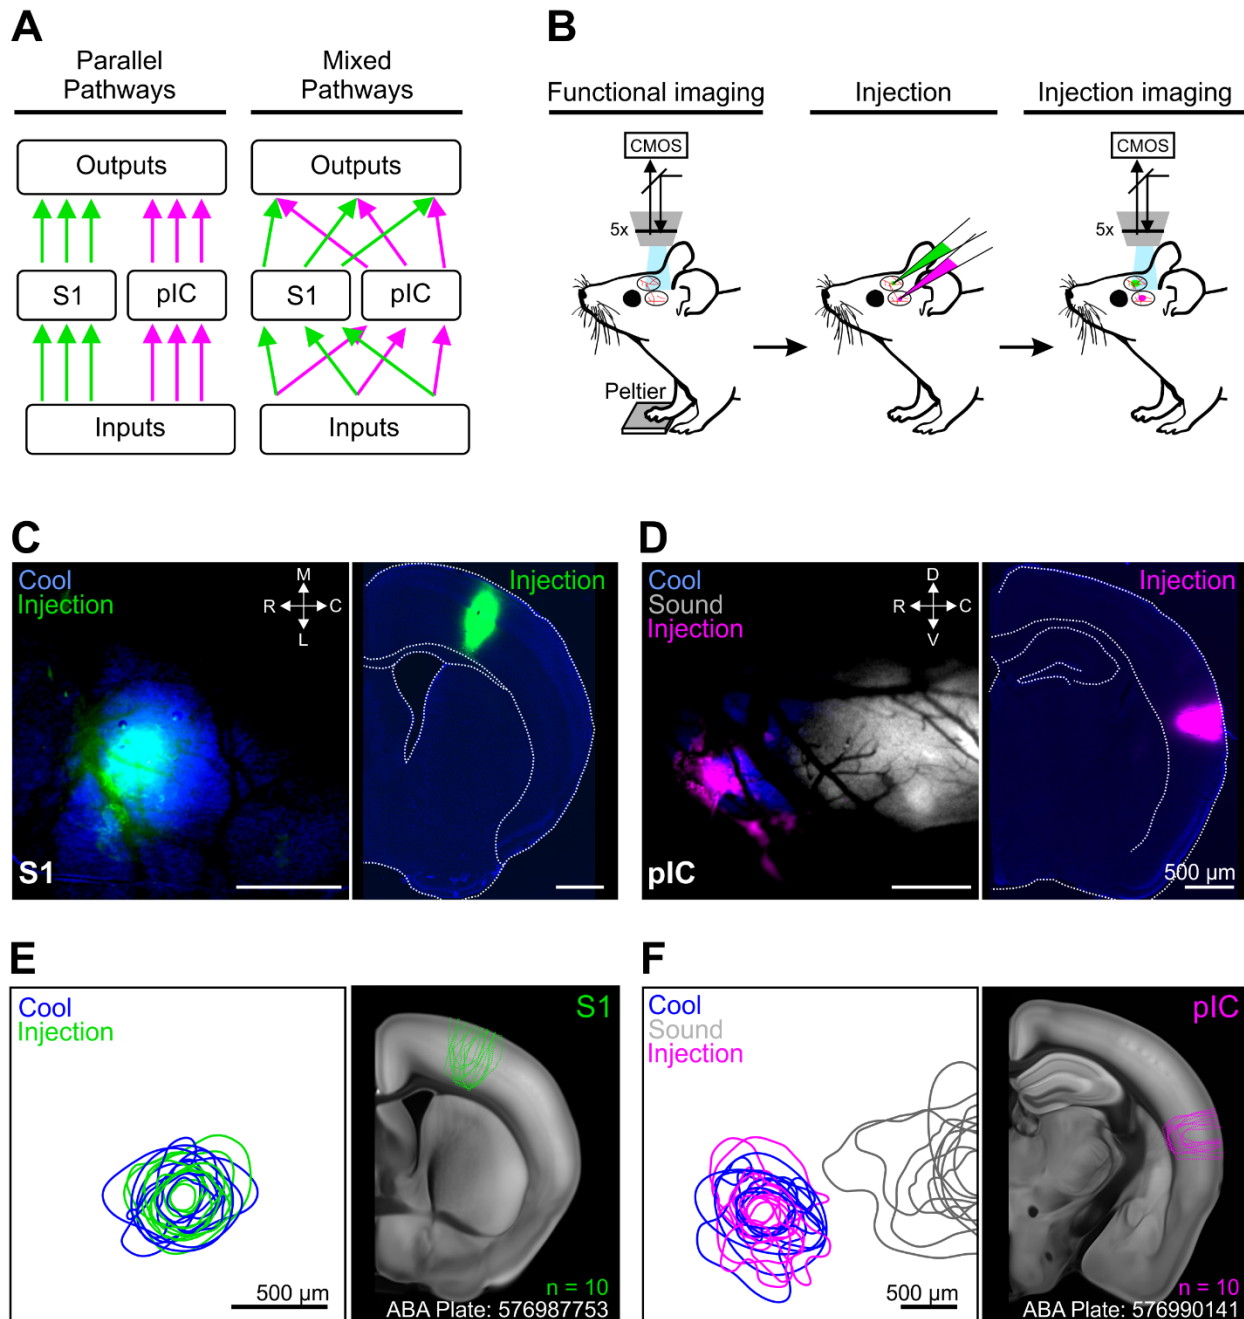

277 **Figure 1.** Functional identification of temperature representation in S1 and pIC for anatomical  
278 input-output tracing. **A**, Cartoon schematic showing segregated and mixed connectivity motifs.  
279 **B**, Schematic representation of the experimental procedure; from left to right, functional  
280 identification of the thermal cortical regions using widefield calcium imaging through a cleared  
281 skull preparation; injection of different color retrograde tracers or anterograde viruses; imaging

282 to confirm alignment of injection sites to thermal representation. **C**, Example mouse imaging of  
283 S1 and corresponding coronal brain slice. Left, overlaid functional response to temperature  
284 (blue), with fluorescent tracer (pseudo-coloured green); right, post-hoc brain slice showing  
285 injection site. Scale bars 500  $\mu\text{m}$ . **D**, Same as (**C**), but for pIC. **E**, Population injection sites and  
286 functional responses over S1. Left shows 80 % contours of the widefield thermal response to  
287 cool stimuli (blue) and fluorescence of the tracer (green) ( $n = 10$  mice, 5 retrograde and 5  
288 anterograde injections) aligned to peak temperature response in S1. Right shows outlines of all  
289 injection sites localized on coronal brain slice 54 from the Allen Brain Atlas. **F**, Left, same as **E**  
290 (left), but for pIC and including response to 8 kHz sound stimulation (gray). Right, same as **E**  
291 (right), but coronal brain slice section 70 of the Allen Brain Atlas.

292

### 293 **Whole-brain input-output connectivity of forelimb S1 and pIC**

294 To quantify the whole-brain inputs and outputs of S1 and pIC on a broad scale (Figure 2A,  
295 C), we initially defined 6 major regions; cortex, striatum/pallidum, amygdala,  
296 thalamus/hypothalamus, midbrain, and hindbrain (Figure 2B, D). The majority of inputs originated  
297 in the side ipsilateral to the injection site, with contralateral inputs almost exclusively located in  
298 the contralateral cortex (Figure 2A, S1 ipsi: 91 %, S1 contra: 9 %, pIC ipsi: 80 %, contra: 20 %).  
299 The overall brain-wide distribution of inputs was similar for S1 and pIC, with the cortex being the  
300 dominant source of ipsilateral inputs to S1 and pIC, however pIC showed a higher connectivity  
301 with the contralateral cortical regions than S1 (Figure 2B – right, S1: 8 %, pIC: 19 %,  $p = 0.01$ ).  
302 The ipsilateral thalamus was the second major input region, with significantly more inputs  
303 projecting to S1 than pIC (Figure 2B - left, S1: 10 %, pIC: 6 %,  $p = 0.01$ ). Intriguingly, the amygdala  
304 projected to pIC but not to S1.



305 Like inputs to S1 and pIC, brain-wide outputs mostly targeted regions ipsilateral to the  
306 injection site (Figure 2B, S1 ipsi: 74 %, S1 contra: 26, pIC ipsi: 86 %, pIC contra: 14 %). The major  
307 target of S1 and pIC axons was the cortex, which received a similar amount of ipsilateral  
308 innervation (Figure 2D - right, S1: 43 %, pIC: 46 %,  $p = 0.11$ ), while projections from S1 to the  
309 contralateral cortex were stronger than from pIC (Figure 2D – left, S1: 14 %, pIC: 8 %,  $p = 0.01$ ).  
310 The second major innervation target of S1 and pIC was the striatum/pallidum, which received  
311 similar levels of ipsilateral input (Figure 2D - left, S1: 15 %, pIC 14 %,  $p = 0.6$ ), but significantly  
312 more contralateral input from S1 than pIC (Figure 2D - right, S1: 5 %, pIC: 2 %,  $p = 0.001$ ).  
313 Ipsilateral and contralateral axonal targets from S1 and pIC innervated the thalamus (Figure 2D,  
314 S1 ipsi: 8 %, pIC ipsi: 8 %,  $p = 0.98$ , S1 contra: 0.2 %, pIC contra: 0.4 %,  $p = 0.19$ ) and hindbrain  
315 (Figure 2D, S1 ipsi: 2 %, pIC ipsi: 2 %,  $p = 0.98$ , S1 contra: 2 %, pIC contra: 2 %,  $p = 0.52$ ) to  
316 similar levels. Both ipsilateral and contralateral sides of the midbrain received more innervation  
317 from pIC compared to S1 (S1 ipsi: 7 %, pIC ipsi: 12 %,  $p = 0.004$ , S1 contra: 0.3 %, pIC contra: 1  
318 %,  $p = 0.002$ ). Closely resembling the inputs, the amygdala was innervated exclusively by pIC  
319 outputs and not by S1 (pIC ipsi: 1.2 %, pIC contra: 0.2 %).

320 To examine connectivity at higher resolution, we went on to subdivide the 6 major  
321 anatomical areas into 70 subregions and present data from regions ipsilateral to the injection side  
322 (for a comprehensive list of all ipsilateral and contralateral connections, see Supplementary  
323 Figures 4, 5, and Supplementary Tables 2, 3). To assess S1 and pIC connectivity at different  
324 scales, we compare the connectivity strength as well as spatial distributions of regions, subregion  
325 nuclei and single cells.

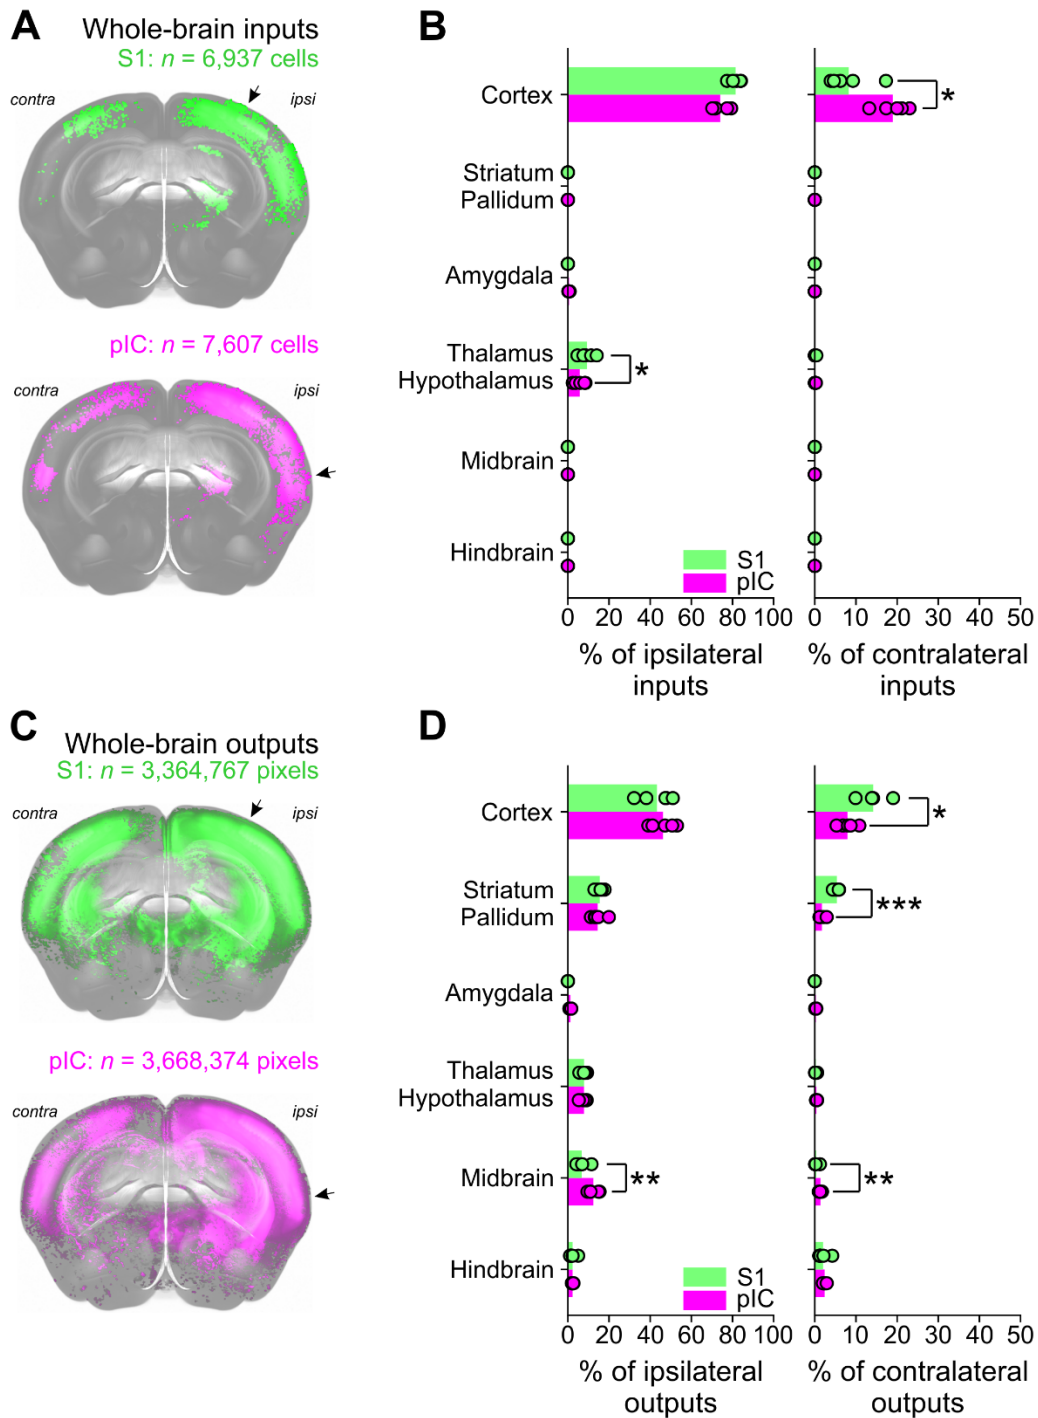

326 **Figure 2.** Whole-brain visualization of long-range inputs and outputs of thermal regions of S1 and  
 327 pIC. **A**, Front view of a 3D brain reconstruction showing brain wide cell bodies providing input to  
 328 S1 (top – green,  $n = 6,937$  identified cell bodies) or pIC (bottom – magenta,  $n = 7,607$  identified  
 329 cell bodies), from one example mouse. Arrows indicate the location of injection. **B**, A comparison

330 of the ipsilateral (left) and contralateral (right) inputs from 6 brain regions to S1 (green) or pIC  
331 (magenta) as a percentage of the whole-brain inputs. \* shows significant difference between  
332 inputs to S1 vs pIC ( $n = 5$  mice,  $p < 0.05$ , two-way independent  $t$ -test). Bars show means, open  
333 circles show individual mice. **C**, Same as **B** but showing reconstruction of pixels labelled with  
334 axonal outputs (green,  $n = 3,364,767$  pixels; magenta  $n = 3,668,373$  pixels). **D**, Same as **B**, but  
335 showing a comparison of cortical axonal outputs in target regions (\* =  $p < 0.05$ , \*\* =  $p < 0.01$ , \*\*\*  
336 =  $p < 0.001$ ).

337

### 338 **Whole-brain inputs to forelimb S1 and pIC**

339 Visualizing inputs to S1 and pIC at different angles of a 3D projection, revealed dense  
340 labelling across many cortical and thalamic nuclei (Figure 3A, Supplementary Table 2,  
341 Supplementary Movie 1). The majority of inputs showed a similar innervation strength to S1 and  
342 pIC. Notable exceptions included stronger inputs to S1 than pIC from regions involved in  
343 sensorimotor processing, including primary motor cortex (MOp, 26 %,  $p = 0.03$ , Figure 3B, 3Bi)  
344 and secondary somatosensory cortex (SSs, 21 %,  $p = 0.01$ ). In support of its role in diverse  
345 sensory and cognitive functions (Gogolla, 2017), pIC received significantly input from a broader  
346 range of cortical nuclei, including agranular insular cortex (AI, 0.8 %,  $p = 0.02$ ), primary and  
347 dorsal/ventral auditory cortices (AUDp, 2.5 %,  $p = 0.002$ , AUDs: 5.4 %,  $p = 0.009$ ), retrosplenial  
348 cortex (RSP, 0.4 %,  $p = 0.03$ ), temporal association area (TEA, 3.4 %,  $p = 0.04$ ), and visceral  
349 cortex (VISC, 2.2 %,  $p = 0.004$ ). S1 received significantly more thalamic input from nuclei within  
350 the ventral basal and posterior thalamic compartments (Figure 3C, Ci, Cii), including the ventral  
351 posterolateral (VPL and its parvocellular compartment VPLpc, 4 %,  $p = 0.01$ ), the ventral  
352 anterolateral (VAL, 0.7 %,  $p = 0.04$ ), and posterior medial (POM, 2.6 %,  $p = 0.02$ , Figure 3Cii).  
353 Thalamic innervation of the pIC was more diverse than S1, with significantly more input arising  
354 from the medial geniculate nucleus (MGn, 0.5 %,  $p = 0.002$ ) and a prominent innervation from the

355 primary triangular (POt) nucleus (Figure 3Ciii, 1.1 %,  $p = 0.006$ ) that did not project to S1. In  
356 agreement with prior literature (Shi and Cassell, 1998a, 1998b; Schiff et al., 2017), we did not  
357 observe any innervation of S1 by the amygdala (Figure 3D). In contrast, pIC was innervated by  
358 cortical-like regions of the amygdala, the majority of which came from the lateral amygdala (LA,  
359 0.3 %, Figure 3Di). The baso-lateral (BLA, 0.06 %, Figure 3Dii) and piriform-amygdala area (PAA,  
360 0.07 %, Figure 3Dii) innervated pIC to a lesser extent and very few retrogradely labelled cell  
361 bodies from S1 and pIC were observed in the striatum-like centromedial nuclei (CeA, MeA both  
362  $< 0.05$  %). Together these data show that pIC and S1 share input regions with the exception of  
363 the amygdala that projects exclusively to pIC.

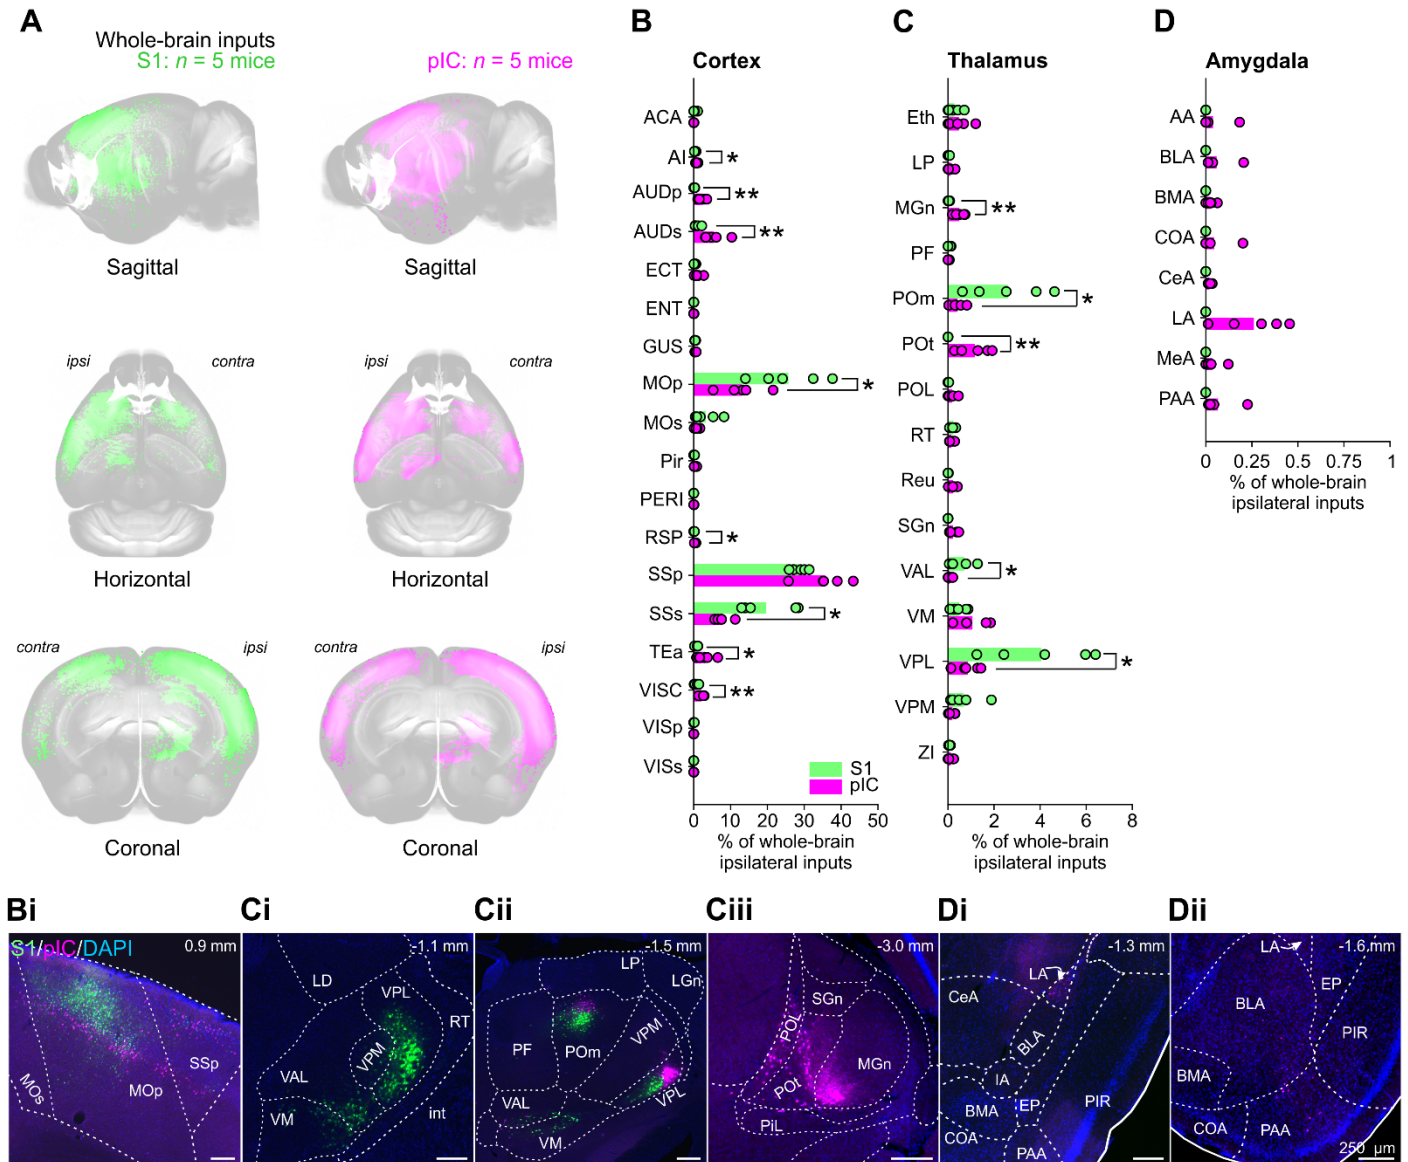

364 **Figure 3.** Whole-brain ipsilateral inputs to thermally responsive in S1 and pIC. **A**, Whole brain 3D  
 365 images of cell bodies labelled with CTb 647 (pseudo-coloured green, S1 injection) or Ctb 555  
 366 (pseudo-coloured magenta, pIC injection). Cell bodies were identified and registered to the Allen  
 367 CCF v 3.0. **B**, **C**, **D**, Proportions of whole-brain ipsilateral inputs to S1 (green), or pIC (magenta)  
 368 (**B**) cortical, (**C**) thalamic, or (**D**) amygdaloid subregions. Bars show means and open circles show  
 369 individual mice. \* =  $p < 0.05$ , \*\* =  $p < 0.01$ ,  $n = 5$  mice per condition. See Supplementary Table 2  
 370 for proportions of all subregions. Representative example brain slices of inputs to S1 (green) or

371 pIC (magenta) from different (**Bi**) cortical, (**Ci**, **Cii**, **Ciii**) thalamic or (**Di**, **Dii**) amygdaloid  
372 subregions. Scale bars, 250  $\mu\text{m}$ . A list of abbreviations is shown in Supplementary Table 1.

373

#### 374 **Axonal output targets of forelimb S1 and pIC**

375 Axonal projections from S1 and pIC broadly innervate the entire mouse brain (Figure 4A),  
376 with S1 and pIC both having more output than input targets. At subregion resolution, we noted a  
377 number of significant differences in the comparative strengths of innervation (Figure 4B to F,  
378 Supplementary Table 3, Supplementary Movie 2). Similar to the pattern of inputs to S1 and pIC,  
379 axonal outputs from S1 mostly innervated regions involved in somatosensory processing, such  
380 as primary and secondary motor cortices (MOp, 9 %,  $p = 0.03$ , MOs, 5 %,  $p = 0.006$ , Figure 4Bi),  
381 whereas pIC neurons innervated a broader number of cortical regions areas, including AI (1.6 %,  $p = 0.02$ ),  
382 AUDp (1.6 %,  $p = 0.005$ ), AUDs (3.5 %,  $p = 0.01$ ), ectorhinal (ECT, 1.6 %,  $p = 0.0004$ ),  
383 entorhinal (ENT, 0.8 %,  $p = 0.02$ ), gustatory (GUS: 0.7 %,  $p = 0.004$ ), piriform (Pir, 0.4 %,  $p =$   
384 0.0006), perirhinal (PERI, 0.5 %,  $p = 0.02$ ), TEA (2 %,  $p = 0.0009$ ) and VISC (1.9 %,  $p = 0.0005$ ).  
385 Notable differences between the thalamic innervation from S1 and pIC included significantly more  
386 S1 outputs innervating VAL (0.7 %,  $p = 0.003$ , Figure 4Ci), the ventral medial nucleus (VM, 0.7  
387 %,  $p = 0.04$ , Figure 4Ci), the parafascicular nucleus (PF, 0.5 %,  $p = 0.02$ , Figure 4Cii), and POM  
388 (1.5 %,  $p = 0.01$ , Figure 4Cii); while stronger pIC innervation was observed in MGn (0.8 %,  $p =$   
389 0.004), the supragenulate nucleus (SGn, 0.02 %,  $p = 0.003$ ), and the posterior limiting nucleus  
390 (POL, 0.4 %,  $p = 0.002$ ). As with their inputs, the POt was selectively innervated by pIC and not  
391 by S1 (0.6 %, Figure 4Ciii). Similarly, the amygdala was innervated by pIC and not by S1 (Figure  
392 4D) with the majority of pIC outputs targeting the striatum like central and medial amygdala nuclei  
393 (CeA and MeA, collectively 0.67 %, Figure 4Di, 4Dii), and to a lesser extent, the cortical like  
394 basolateral and basomedial nuclei (BLA, BMA and LA, collectively 0.54 %, Figure 4Di, 4Dii).  
395 Unlike their inputs, outputs from S1 and pIC strongly targeted a range of nuclei in the midbrain

396 and hindbrain. The primary target of both S1 and pIC was the MRN, however S1 axons  
397 significantly innervated the anterior pretectal nucleus (APN, 0.45 %,  $p = 0.04$ , Figure 4Ciii) and  
398 the red nucleus (RN, 0.13 %,  $p = 0.04$ ) more than pIC (Figure 4E), whereas pIC showed  
399 significantly more innervation of the cuneiform nucleus (CUN, 0.13 %,  $p = 0.0006$ ), inferior  
400 colliculus (ICs: 2 %,  $p = 0.0002$ , Figure 4Ei), and the periaqueductal gray (PAG, 2.8 %,  $p = 0.001$ ,  
401 Figure 4Ei). The hindbrain received similar levels of axonal output from both S1 and pIC (Figure  
402 4F), with one notable difference being the stronger innervation of the parabrachial nucleus by the  
403 pIC (PBN, 0.25 %,  $p = 0.006$ , Figure 4Fi), an area that forwards thermal information to circuits in  
404 the hypothalamus that regulate body temperature.



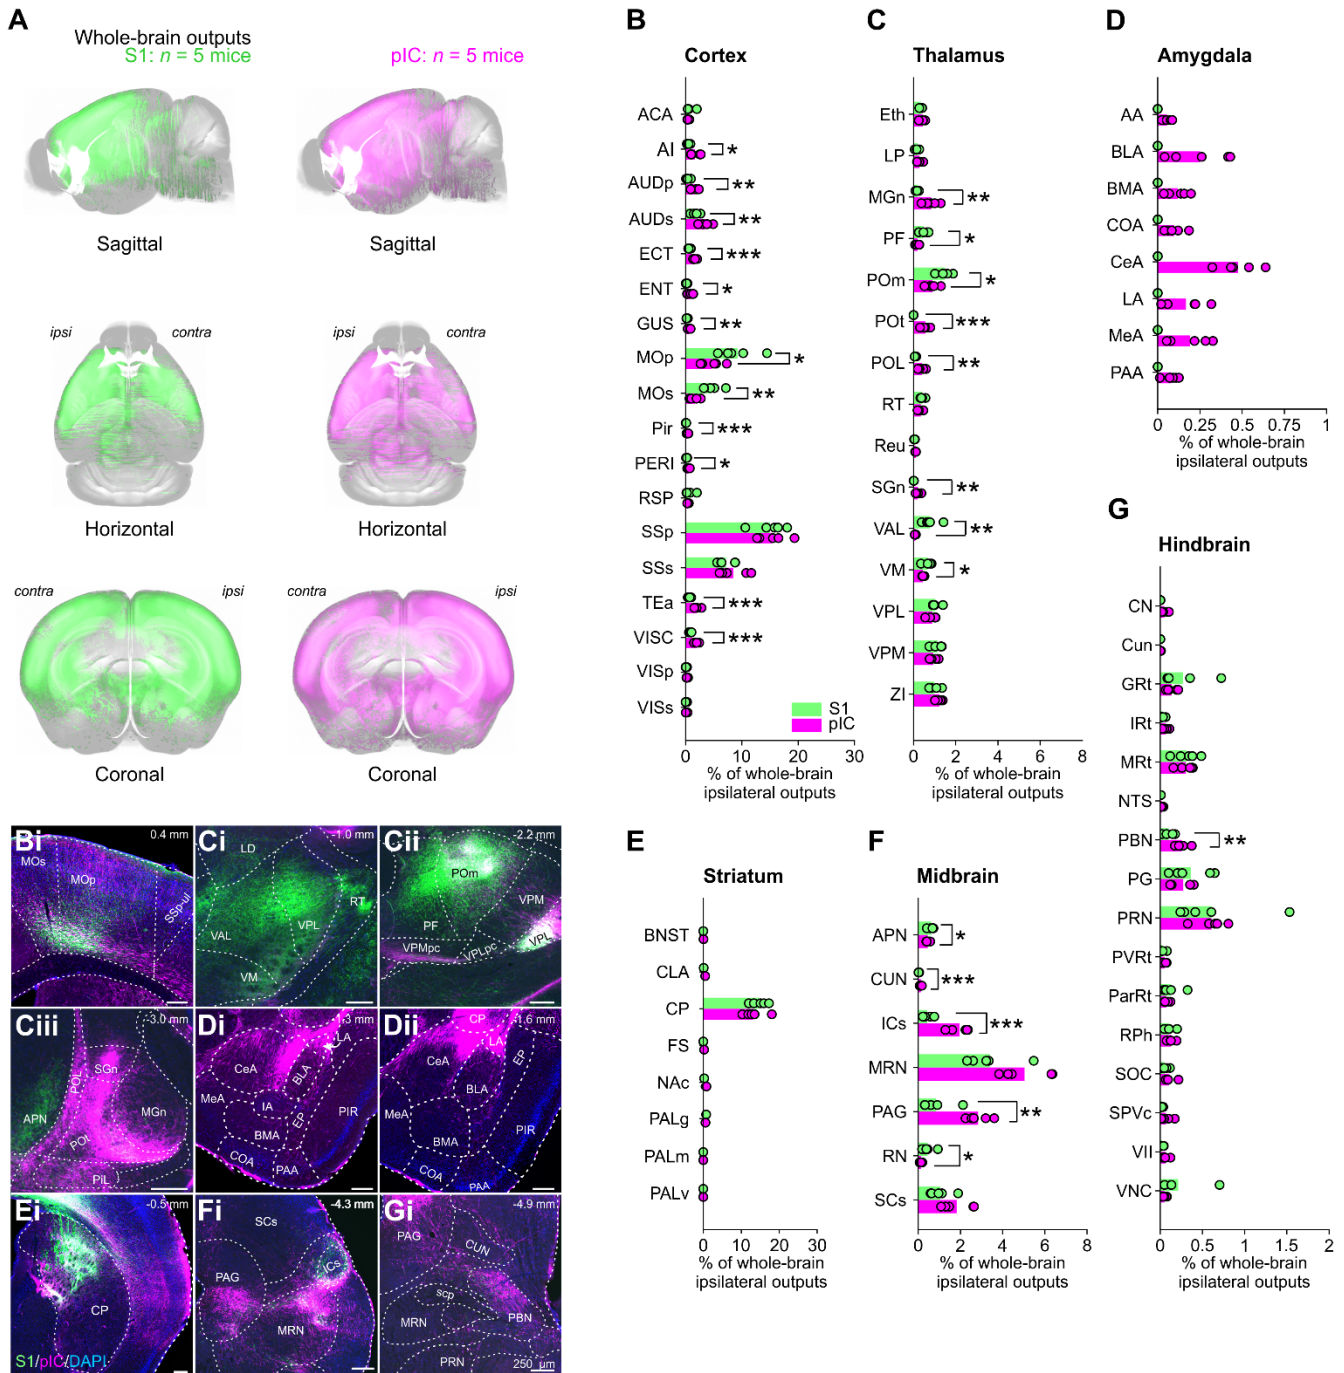

405 **Figure 4.** Whole-brain ipsilateral outputs from thermally responsive S1 and pIC. **A**, AAV  
 406 fluorescence viruses were injected into thermally responsive areas of S1 and pIC. The identified  
 407 axons projecting from S1 (left) or pIC (right) were extracted and registered to the Allen CCF v 3.0  
 408 **B, C, D, E, F, G**, Proportions of whole-brain ipsilateral outputs from S1 (green), or pIC (magenta)



409 across individual **(B)** cortical, **(C)** thalamic, **(D)** amygdaloid, **(E)** striatal, **(F)** midbrain, or **(G)**  
410 hindbrain subregions. Bars show means and open circles show individual mice. \* =  $p < 0.05$ , \*\* =  
411  $p < 0.01$ ,  $n = 5$  mice per condition. See Supplementary Table 2 for proportions of all subregions.  
412 Representative example brain slices of outputs from S1 (green) or pIC (magenta) from different  
413 **(Bi)** cortical, **(Ci, Cii, Ciii)** thalamic, **(Di, Dii)** amygdaloid, **(Ei)** striatal, **(Fi)**, midbrain **(Gi)** and  
414 hindbrain subregions. Scale bars, 250  $\mu\text{m}$ . A list of abbreviations is provided in Supplementary  
415 Table 1.

416

### 417 **Reciprocal connectivity of forelimb S1 and pIC**

418 A canonical feature of cortical wiring is reciprocal connectivity, whereby regions providing  
419 input also receive outputs from the target region. Plotting the input and output circuit diagrams  
420 from our tracing data highlighted that a number of cortical and thalamic regions were reciprocally  
421 connected with S1 and pIC (Figure 5A, B). In contrast, the hindbrain, midbrain and striatum only  
422 received axonal projections from S1 and pIC without providing direct inputs. To investigate the  
423 reciprocal connectivity between S1 and pIC, we plotted the strengths of cortical, thalamic and  
424 amygdaloid inputs against their respective innervation from S1 and pIC (Figure 5C,  
425 Supplementary Figure 7). In agreement with an established model of cortico-cortical connectivity  
426 (Felleman and Van Essen, 1991), we observed strong reciprocity for both S1 and pIC with other  
427 cortical regions (S1:  $r = 0.96$ ,  $p < 0.0001$ , pIC:  $r = 0.95$ ,  $p < 0.0001$ ). The thalamus was highly  
428 reciprocal with S1 ( $r = 0.68$ ,  $p = 0.005$ ) and not with pIC ( $r = 0.25$ ,  $p = 0.370$ ). The connectivity  
429 between pIC and the amygdala was dominated by outputs from the pIC, and, while it did provide  
430 inputs to pIC, the correlation between input and output strength was not significant at the  
431 population level ( $r = -0.11$ ,  $p = 0.79$ ).

**A** Whole brain ipsilateral inputs of S1 and pIC

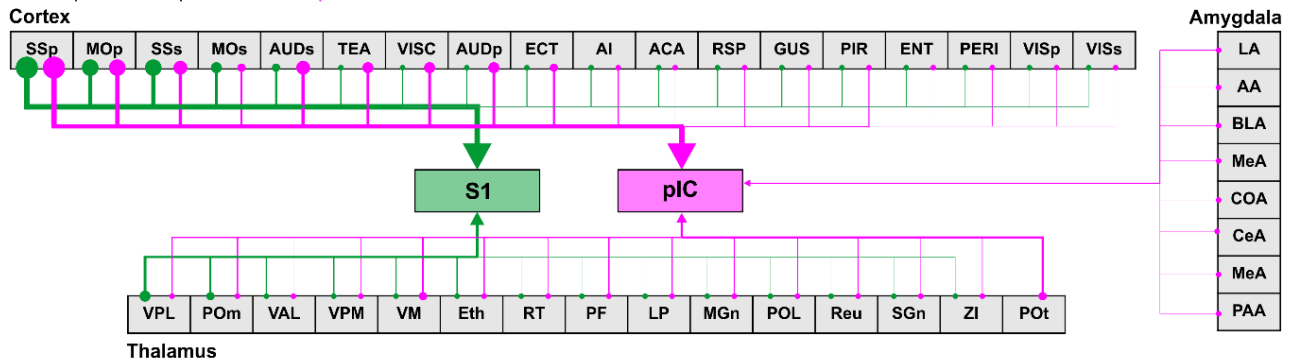

**B** Whole brain ipsilateral outputs from S1 and pIC

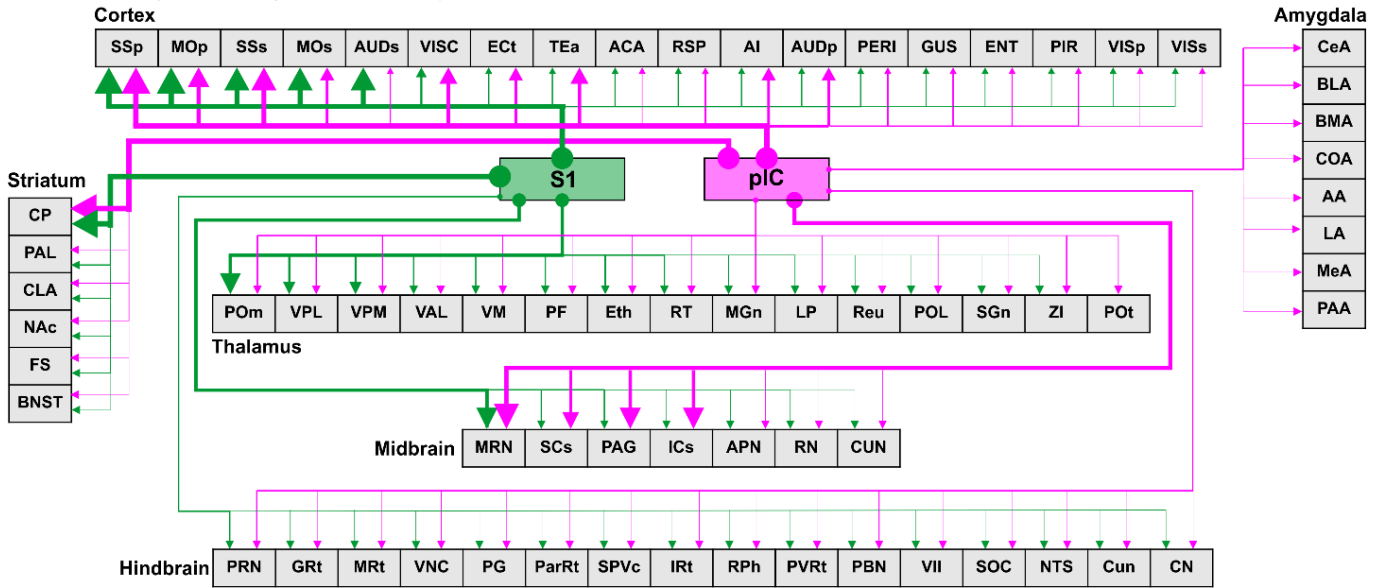

**C** Strength Reciprocity

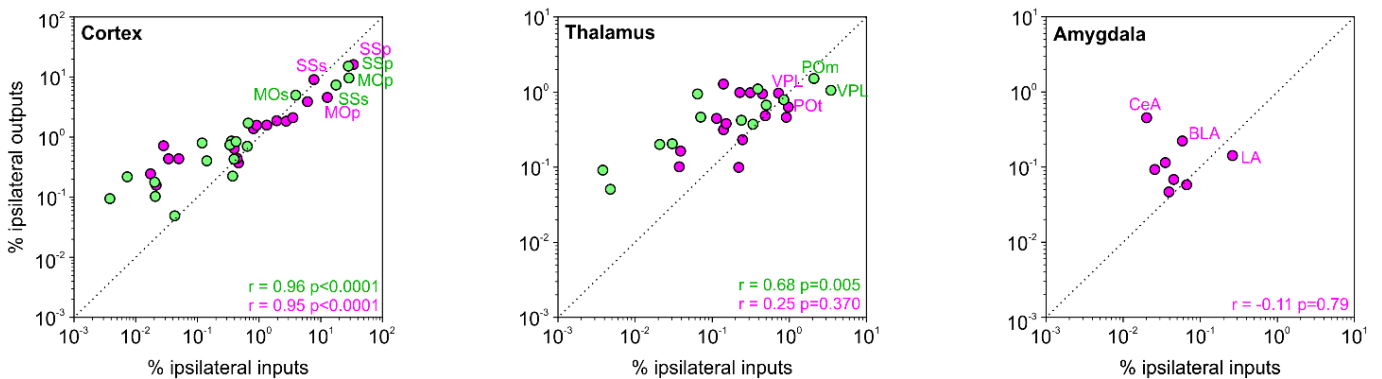

432 **Figure 5.** Wiring diagrams and reciprocity of the strength of inputs and outputs to S1 and pIC.

433 **A,** Schematic wiring diagram showing regions that project to S1 (green) or pIC (magenta).

434 Regions are ordered from left to right based on their projections to S1. Line thickness  
435 corresponds to the strengths of inputs (low, medium, high) in Figure 3 and Supplementary Table  
436 2. For a list of subregion abbreviations see Supplementary Table 1. **B**, Same as (A) but for  
437 axonal projections. Line thickness corresponds to the amount of outputs (low, medium, high)  
438 observed and indicated in Figure 4 and Supplementary Table 3. **C**, Correlations of input/output  
439 strength for S1 (green) and pIC (magenta) subregions in (top) cortex, (middle) thalamus, and  
440 (bottom) amygdala. Individual data points correspond to subregion mean value across mice ( $r =$   
441 Pearson's correlation coefficient). Detailed input/output strength correlations including labelling  
442 of individual data points is provided in Supplementary Figure 7.

443

#### 444 **Spatial organization of S1 and pIC whole-brain inputs and outputs.**

445 On a subregion level, S1 and pIC have similar input structures and output targets.  
446 However, this does not address whether there was target specific connectivity of individual cells  
447 (parallel pathways) or an absence of distinct substructure organization (mixed pathways). To  
448 assess whether subregions contained cells projecting to both S1 and pIC, cells labeled with both  
449 retrograde tracers were counted and projected onto the 3D mouse brain. Dual labelled neurons  
450 were sparse (Figure 6A) compared to the total inputs innervating S1 or pIC. Of all the 84,639 total  
451 cells (5 mice) that projected to S1 or pIC, we identified only 522 neurons that were dual labelled  
452 (Figure 6A, 6Bi, Bii). From subregions providing input to both S1 and pIC (Figure 6C) only 0.65  
453 % cortical, and 0.36 % thalamic neurons projected to both, together indicating that input is  
454 provided by separate circuits.

455 As the inputs to S1 and pIC arose primarily from separate populations, we went on to  
456 analyze the spatial organization of clusters of inputs within each cortical and thalamic subregion.  
457 We defined spatial separability, or overlap (see methods), as the percent of voxels containing  
458 both S1 and pIC projecting neurons within a given subregion. A completely separable map like

459 organization would have an overlap value of 0, while a completely intermingled salt-and-pepper  
460 like organization would have an overlap value of 1. We found that within the cortex and thalamus,  
461 most co-labelled subregions showed non-random, spatially organized inputs that were  
462 significantly different from their shuffled distributions (Figure 6D). This indicates that inputs from  
463 the cortex and thalamus to S1 and pIC are organized in a spatially separate map-like arrangement  
464 within individual subregions.

465 We next asked whether this was also true for axonal projections from S1 and pIC. We  
466 found that cortical and thalamic regions had less spatial overlap of S1 and pIC axons than  
467 expected from a random distribution (Figure 6D). However, while both inputs and outputs  
468 demonstrated spatial separability, the separation for inputs is much higher than outputs (average  
469 input overlap: 0.25, average output overlap: 0.67, Figure 6D). Even after normalizing the overlap  
470 value to the shuffled control value, the input overlap is smaller than the output overlap across  
471 cortical and thalamic subregions (Fig 6E, Supplementary Figure 8). This can be visualized most  
472 clearly in thalamic regions where there is a clear rostrocaudal division in both the input and output  
473 volumes (Fig 6F). In a horizontal projection of VPL, POm, and POt, the S1 inputs are spatially  
474 localized to the rostral region of thalamus, while the pIC inputs are spatially localized to the caudal  
475 regions. At more rostral levels, coronal slices contain exclusively S1 projecting cells (Figure 6Fi)  
476 while caudal coronal slices contain exclusively pIC projecting cells (Figure 6Fiii) with some overlap  
477 at intermediate rostrocaudal levels (Figure 6Fii). In the corresponding output plots, there is a  
478 significantly different distribution of S1 and pIC axonal outputs but a reduced separability  
479 compared to thalamic inputs (Figure 6G).

480 While S1 and pIC share multiple input and output nuclei at a gross scale, these results  
481 suggest that there are finer patterns of connectivity within cortical and thalamic subregions. The  
482 input neurons projecting to S1 and pIC arise from spatially separate populations within each  
483 subregion, supporting the hypothesis that S1 and pIC have parallel input pathways. Though the

484 output projections of S1 and pIC showed non-random spatial separability within each subregion,  
485 this separation was lower than the input populations, supporting a more mixed model of S1 and  
486 pIC outputs.

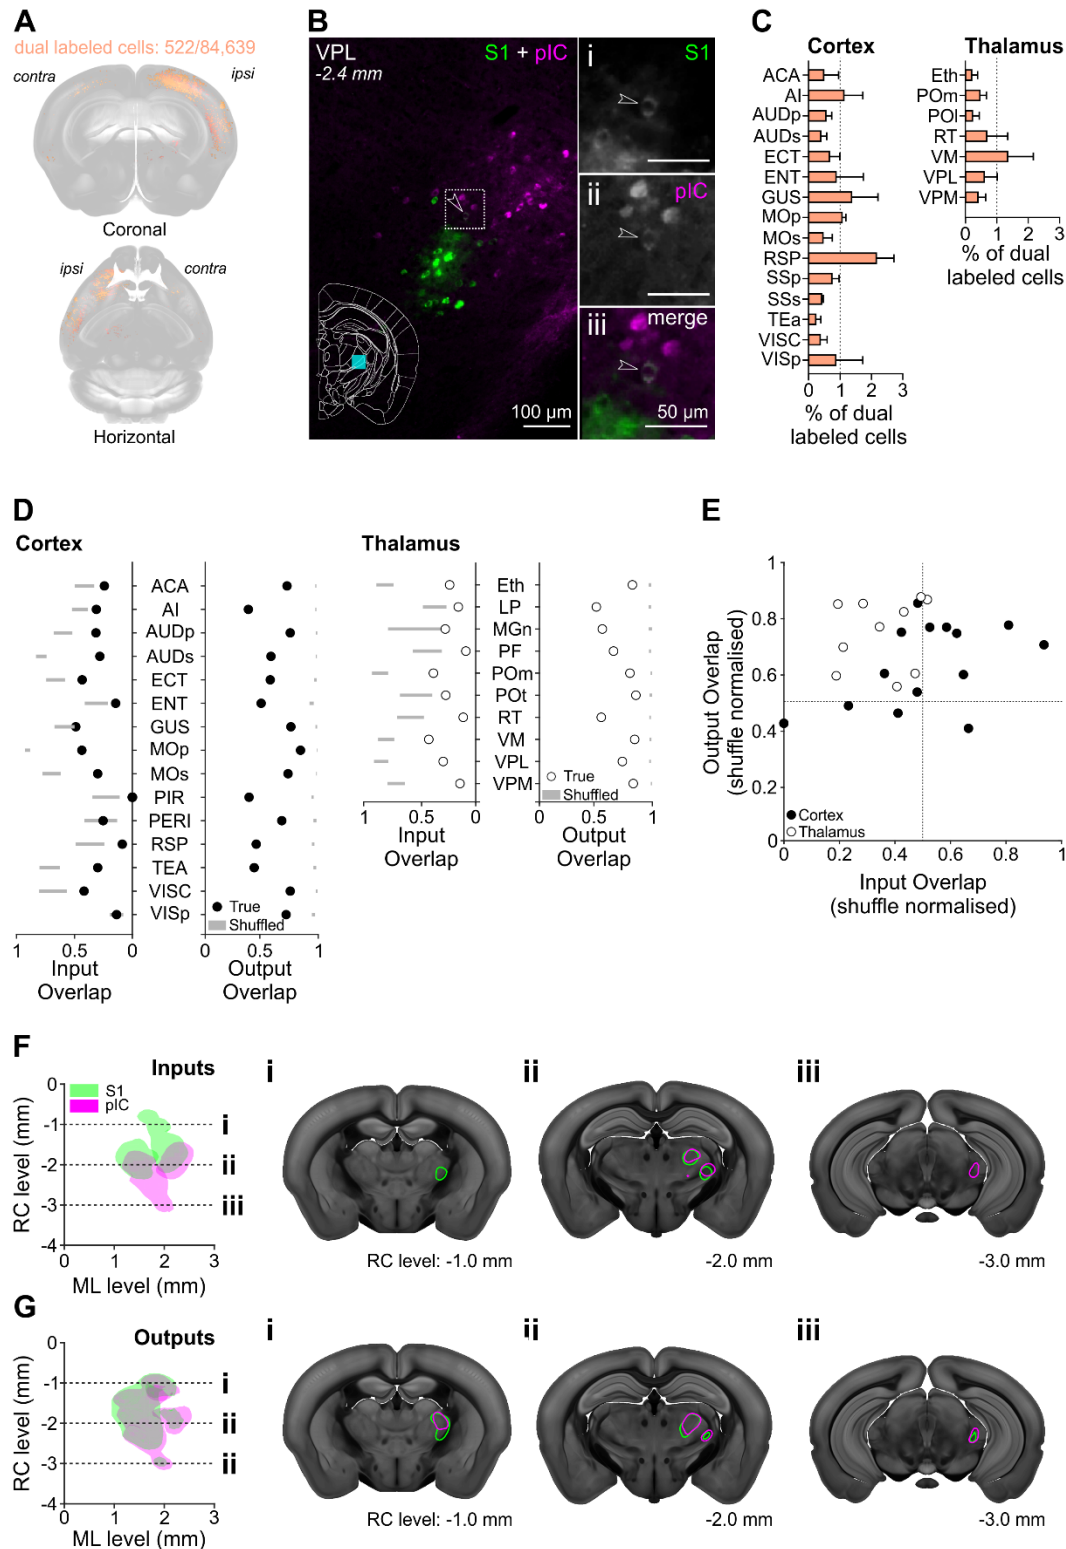

487

488 **Figure 6.** Spatial organization of cortical and thalamic inputs and outputs from S1 and pIC. **A**,

489 Cell bodies labelled with both Ctb647 and Ctb555 (pseudocoloured orange) that project to S1 and

490 pIC registered to the Allen CCF v 3.0. **B**, Representative micrograph of a coronal section showing  
491 the VPL nucleus with a Ctb positive cells projecting to S1 (**i** – green) or pIC (**ii** – magenta), and  
492 one identified cell that projects to both S1 and pIC (**iii** – white). **C**, Percentage of dual labelled  
493 cells projecting to S1 and pIC in cortical and thalamic nuclei (mean +/- SEM). Full list of  
494 abbreviations in Supplementary Table 1. **D**, Input and output overlap coefficients quantified from  
495 multiple cortical or thalamic nuclei. Dots show mean true data while gray bars represent 99 %  
496 confidence intervals of the shuffled distributions. **E**, Input and output overlap coefficients  
497 normalized by the shuffle distribution mean for each region. Each circle denotes an individual  
498 brain region. Open circles denote thalamic regions, close circles denote cortical regions. Detailed  
499 labelling of individual data points is provided in Supplementary Figure 8. The position of the data  
500 points in the upper left quadrant of the graph demonstrate that inputs are less overlapped than  
501 outputs. Note that thalamic regions (open circles) are further from the diagonal than cortical  
502 regions (black), indicating that the thalamic regions show a greater difference in their input/output  
503 spatial overlap than cortex. **F**, Horizontal projection of reconstructed VPL, POm, and POt inputs  
504 to S1 (green) or pIC (magenta) (left). Coronal sections showing a rostral targeting S1 region (**i**),  
505 intermediate S1 and pIC targeting region (**ii**) and a caudal targeting pIC region (**iii**). **G**, Same as  
506 F except for thalamic outputs from S1 (green) and pIC (magenta) showing major overlap at all  
507 rostral caudal axis (**i**, **ii**, **iii**).

508

## 509 **DISCUSSION**

510 Here we used functionally targeted tracer injections to generate a comprehensive map of long-  
511 range inputs and outputs from two cortical representations of temperature. This approach allowed  
512 a direct comparison of S1 and pIC connectivity in the same mice. While both areas receive input  
513 from common cortical and thalamic regions, pIC thalamic input is more widespread and, at cellular  
514 resolution, inputs to both areas originated from largely non-overlapping and spatially separated  
515 neuronal populations. Despite receiving independent inputs, S1 and pIC innervate similar long  
516 range cortical and subcortical regions with axonal projections that were less spatially separated  
517 than their inputs, implying that the formation of coherent thermal percepts involves the  
518 convergence of cortical outputs. Notably, exclusive connectivity was observed between the pIC  
519 and the amygdala, PBN of the hindbrain, and the POt. Together, our data suggest that thermal  
520 information forms at least two separate pathways that run via S1 and pIC and are widely broadcast  
521 across the brain.

### 522 **Limitations and considerations – identification and nomenclature of pIC**

523 A classic approach to address wiring of a brain region is to inject neuronal tracers using bregma  
524 coordinates for targeting a region of interest. Bregma coordinates, however, are notoriously  
525 variable from mouse to mouse. To address this, we functionally targeted our injections to the  
526 center of the widefield cortical calcium response to cool stimuli delivered to the forepaw. In order  
527 to standardize connectivity maps between mice, we then aligned brain slices to the mouse brain  
528 atlas from the Allen Mouse Brain Common Coordinate Framework version 3, which is widely used  
529 to standardize maps of neural circuitry (ABA, Pollak Dorocic et al., 2014; Do et al., 2016;  
530 Niedworok et al., 2016; Zhang et al., 2016; Fürth et al., 2018; Wang et al., 2020; Benavidez et al.,  
531 2021; Dempsey et al., 2021). Aligning to the ABA allowed correction for multi-plane distortion,  
532 misalignment, and tissue deformation during tissue processing, however, area borders in the ABA



533 have chiefly been constructed using anatomical markers rather than functional properties of  
534 regions, potentially leading to discrepancies in less well studied areas.

535 In this study, functionally targeted injections into the thermal region of forelimb S1 were  
536 localized post-hoc in the primary somatosensory upper limb region of the ABA (SSp-ul). Injections  
537 into pIC, however, were labelled as secondary somatosensory cortex (SSs) or the dorsal and  
538 ventral auditory area (AUDs, see: Figure 1). Work in multiple mammalian species has identified  
539 a somatotopic representation of cutaneous tactile input located in an area ventral to secondary  
540 somatosensory cortex (SSs), dorsal to the rhinal vein, bordering rostral regions of the auditory  
541 cortex and containing an anterior auditory field and termed parietal ventral (PV) area or posterior  
542 insular cortex (pIC) (in squirrels: Krubitzer et al., 1986, hedgehog: Catania et al., 2000, opossum:  
543 Beck et al., 1996, marmosets/macques: Krubitzer and Kaas, 1990; Krubitzer et al., 1995, mice:  
544 Gogolla et al., 2014; Nishimura et al., 2015, rat: Fabri and Burton, 1991a; Remple et al., 2003;  
545 Rodgers et al., 2008; Zhang et al., 2020). Using widefield calcium imaging, we have recently  
546 shown that this area contains somatotopically organized and rich cellular representations of cool  
547 and warm (Vestergaard et al., 2022), in contrast to the cool dominated representation in S1.  
548 Together with its profound impact on thermal perception, these data support the hypotheses that  
549 this region houses the primary cortical representation of temperature.

550 Recently, Gămănuț et al. (2018) generated a new horizontal cortical map using multiple  
551 histological staining methods including transgenic mice expressing fluorophores (tdTomato) in  
552 parvalbumin neurons and muscarinic acetylcholine receptor, as well as cytochrome oxidase and  
553 VGlut2 staining. In this map, the borders of the visceral cortex (VISC), a cortical region likely  
554 homologous to granular IC, are significantly different to that of the ABA (see Supplementary  
555 Figures 1 and 3 of Gămănuț et al., 2018), with VISC forming a lip that envelopes SSs and extends  
556 to the dorsal auditory area (AUDd) rather than ending abruptly and giving rise to the temporal  
557 association area (TEa) and ventral auditory area (AUDv) as in the ABA. In our recent work (see

558 Supplementary Figure 1 of Vestergaard et al., 2022), alignment of flattened cortical sections to  
559 the horizontal cortical atlas modified from Gămănuț et al., 2018 showed that the temperature  
560 response region in pIC was localized in VISC and agrees well with their separation of the S2  
561 boundary with VISC. Together these data suggest that a granular portion of IC (or 'VISC') runs  
562 rostro-caudally along the dorsal aspect of anterior IC. Comparing our injection site locations to  
563 the same coronal sections from the Scnn1a mouse line, which labels layer 4 cortical neurons  
564 (Madisen et al., 2010), suggested that pIC was localized within a granular region of IC  
565 (Supplementary Figure 2).

566 While prior work has named this area PV or pIC, given their tightly overlapping location  
567 and similar sensory representation, we support the proposal by Rodgers et al., 2008 and  
568 Nishimura et al., 2015 that PV and pIC are in fact homologous areas. In agreement with the  
569 naming used by prior work in rodents (Rodgers et al., 2008, 2008; Gogolla et al., 2014; Beukema  
570 et al., 2018; Zhang et al., 2020) and evidence of thermal information processing in human  
571 posterior insular cortex (Craig et al., 2000), here we use the term pIC. To resolve this issue further  
572 and confirm the borders between AUDv, VISC, SSs (as according to the ABA), future work should  
573 perform detailed functional somatotopic mapping of thermal and tactile responses in pIC and SSs  
574 using acoustic stimuli to mark the insular auditory field and AUDv and AUDp followed by post-hoc  
575 histological mapping.

#### 576 **Limitations and considerations – neuronal tracing methods**

577 A critical limiting factor in the interpretation of tracing data lies in the spatial and functional  
578 specificity of the labeling methods. For example, tracer injections could still have spread into  
579 neighboring cortical regions like the primary motor cortex or the somatosensory barrel field that  
580 borders forelimb S1. We addressed this by measuring the spread of tracer for each experiment  
581 and noted that the measured spread of the injectant was unlikely to have spread into neighboring  
582 regions. However, the functional diversity within S1 could not be avoided. The core motivation of

583 this study was to map and compare central circuits involved in thermal processing, but tactile and  
584 thermally responsive cells are spatially intermingled in S1, and are closely neighboring in pIC  
585 (Milenkovic et al., 2014; Vestergaard et al., 2022). Furthermore, pIC contains a thermal  
586 representation and a small auditory representation, the insular auditory field (Sawatari et al., 2011;  
587 Vestergaard et al., 2022). Therefore, our CTb and AAV based tracing from thermally responsive  
588 cortical regions would have labeled touch, temperature and, in pIC, possibly auditory responsive  
589 cells. In future work, this could be addressed by labelling neurons activated only by specific  
590 sensory stimuli through activity dependent expression of fluorescent proteins (e.g. Beukema et  
591 al., 2018) or methods like CANE or TRAP (Capturing and manipulating Activate Neural  
592 Ensembles, and Targeted Recombination in Active Populations) that can be coupled with  
593 anterograde or retrograde tracers (Guenther et al., 2013; Sakurai et al., 2016; Wall et al., 2019).  
594 Single cell electroporation of functionally identified cells could also help investigate thermosensory  
595 specific neuronal circuits, but would be limited to very few cells (Wickersham et al., 2007; Marshel  
596 et al., 2010; Rancz et al., 2011). Despite these limitations, injections shown here encompass both  
597 S1 and pIC thermal representations with the data providing a roadmap for future functional and  
598 anatomical studies.

599 Our study also shared limitations common to anatomical tracing studies (Saleeba et al.,  
600 2019). First, the dense expression and bright fluorescence signal from both CTb and AAV  
601 labelling  $\sim 1 \text{ mm}^3$  from the center of the injection site prevents the analysis of local connectivity  
602 and we therefore masked this region from analysis. Second, though the direction of transport of  
603 CTb is primarily retrograde, it can also label in an anterograde direction. In our datasets, and only  
604 at high illumination for signals close to saturation, we observed some anterograde CTb+ve axons  
605 innervating the striatum (data not shown), but as our automated input analysis was tuned to  
606 identify cell soma (see Methods), these axons were left undetected and discarded upon manual  
607 confirmation. Third, CTb can be taken up by fibers of passage rather than terminating axons or

608 cell bodies (Chen and Aston-Jones, 1995). The use of trans-synaptic retrograde tracing  
609 strategies, including rabies virus based tracing (Wickersham et al., 2007), retrograde AAVs (Tervo  
610 et al., 2016), or herpes simplex virus 1 (HSV-1, Ugolini et al., 1987), may help address this issue  
611 in future studies. However, these methods have their own caveats including tropism for cortical  
612 specific layers and the cellular mechanisms of trans-synaptic transport remain unclear. Moreover,  
613 due to the high connectivity seen between S1 and pIC here, dual rabies based technologies could  
614 label both populations equally and therefore starter populations would not be localized to either  
615 S1 or pIC. Lastly, while AAV based labelling is highly effective in labelling axonal projections, it  
616 does not specifically label synaptic boutons and therefore analysis of axonal projections will  
617 include fibers of passage as well as terminating fibers. Future use of tools that also label  
618 presynaptic sites, e.g. synaptophysin-cre based viruses (Beier et al., 2015; Lerner et al., 2015;  
619 Knowland et al., 2017; Dempsey et al., 2021) could help to resolve this.

#### 620 **Comparison to previous anatomical tracing studies of forelimb S1 and pIC**

621 Despite these possible limitations, our data show similar overall connectivity to previous  
622 connectivity mapping attempts from rodent forepaw S1 (Fabri and Burton, 1991a, 1991b, Zingg  
623 et al., 2014). For example, we observed that inputs to S1 originated from cortical somatosensory  
624 (SSp, SSs) and motor regions (MOp) as well as lemniscal and paralemniscal thalamic nuclei  
625 (VPL, POm). Moreover, S1 targeted similar cortical, striatal, thalamic, mid- and hind-brain  
626 subregions to the whole-brain forepaw S1 output mapping by Zakiewicz et al., 2014. Two  
627 differences to Zakiewicz et al., 2014 were strong projections from S1 to PAG and MRN and the  
628 lack of innervation of the substantia nigra. These differences could result from the use of different  
629 model systems (rat vs mouse), different tracers (BDA vs AAV), or injection volumes and spread.  
630 In support of this, a similar approach using virally expressed tracers by Oh et al., 2014 showed  
631 axonal projections from forelimb S1 to PAG and MRN, whereas only faint projections were

632 observed following anterograde tracer injections of Phaseolus vulgarisleukoagglutinin (Pha-L) or  
633 biotinylated dextran amine (BDA) in Zingg et al., 2014.

634         The connectivity of rodent insular cortex has received great attention (Akers and Killackey,  
635 1978; Guldin and Markowitsch, 1983; Cechetto and Saper, 1987; Allen et al., 1991; Shi and  
636 Cassell, 1998a, 1998b; Kimura et al., 2010; Mathiasen et al., 2015; Gehrlach et al., 2020), but in  
637 the majority of these studies tracer injections were not functionally targeted and only a small  
638 minority partially labelled the pIC region we examine here. Detailed comparisons are therefore  
639 challenging, but in broad agreement with prior work, we found that somatosensory and associated  
640 motor cortices (SSp, SSs and MOp) as well as key somatosensory thalamic nuclei (VPL, POm,  
641 POt) and amygdaloid subregions (LA, PAA and BLA) provide input to pIC. Likewise output targets  
642 were similar to those reported by (Shi and Cassell, 1998a) and (Kimura et al., 2010) who targeted  
643 the rat insular auditory field using electrophysiological mapping. One difference to Kimura et al.  
644 2010, was the projection from pIC to the midbrain PAG, however in agreement with our data  
645 lateral PAG innervation has been observed from a caudal granular insular cortex region in mice  
646 (Oh et al., 2014; Zingg et al., 2014), perhaps reflecting a technical or species difference.

## 647 **Outlook**

648 Understanding the wiring of the thermal system is important for a mechanistic assessment of  
649 thermal perception as well as the binding of diverse thermo-tactile percepts. Our results indicate  
650 that thermal information is routed to S1 and pIC by non-overlapping input pathways. It remains  
651 unclear why there is a far weaker representation of warm in forelimb S1 compared to pIC  
652 (Vestergaard et al., 2022), however, the identification of separate input pathways could help  
653 address this unexpected functional difference. From forelimb S1 and pIC, sensory information is  
654 then forwarded to more overlapping areas, perhaps reflecting the need to bind complex features  
655 during haptic exploration.

656           We observed exclusive connectivity of pIC with the amygdala, parabrachial nucleus  
657 (PBN), and POt. The PBN is known to forward thermal information to the hypothalamus for the  
658 control of body temperature (Madden and Morrison, 2019) and this connection suggests that pIC  
659 could provide top-down influence on body temperature. The POt receives direct input from dorsal  
660 layers of the spinal cord (Gauriau and Bernard, 2004; Al-Khater et al., 2008), and has been  
661 proposed to be the rodent homologue of VMpo (Gauriau, 2004), a structure in the primate  
662 thalamus proposed to be responsible for the routing of thermal information to pIC (Craig et al.,  
663 1994). Forelimb S1 and pIC also share connectivity with other thalamic nuclei, and a key question  
664 for future work is to address the cellular encoding of non-painful temperature in the thalamus. The  
665 strong connectivity of pIC with amygdala supports a role for valence encoding of temperature,  
666 and may help address the mechanisms behind the rapid learning of thermal perception tasks in  
667 mice (Paricio-Montesinos et al., 2020). Overall, our study provides a framework for the  
668 identification of neural mechanisms of thermal perception.

669 **Acknowledgements:** We thank Alison Barth, Niccolo Zampieri, and members of the Poulet lab  
670 for constructive comments on earlier versions of the manuscript, and Svenja Steinfeldler for help  
671 with administrative and technical aspects.

672 **Funding:** This work was supported by the European Research Council (ERC-2015-CoG-682422,  
673 J.F.A.P.), the Deutsche Forschungsgemeinschaft (DFG, FOR 2143, J.F.A.P., SFB 1315, J.F.A.P.)  
674 and the Helmholtz Society (J.F.A.P.). C.J.W was supported by Human Frontier Science Program  
675 (HFSP LT000359/2018-L).

676 **Author contributions:** P.B., and J.F.A.P designed the study. P.B performed all experiments.  
677 P.B., C.J.W., and T.M.L analyzed the data. P.B. and J.F.A.P wrote the manuscript.

678 **Competing interests:** Authors declare no competing interests.

679 **Data and material availability:** Datasets and code will be deposited on public repositories.

## 680 **References**

- 681 Akers, R.M., Killackey, H.P., 1978. Organization of corticocortical connections in the parietal  
682 cortex of the rat. *J. Comp. Neurol.* 181, 513–537. <https://doi.org/10.1002/cne.901810305>
- 683 Al-Khater, K.M., Kerr, R., Todd, A.J., 2008. A quantitative study of spinothalamic neurons in  
684 laminae I, III, and IV in lumbar and cervical segments of the rat spinal cord. *J. Comp.*  
685 *Neurol.* 511, 1–18. <https://doi.org/10.1002/cne.21811>
- 686 Allen, G.V., Saper, C.B., Hurley, K.M., Cechetto, D.F., 1991. Organization of visceral and limbic  
687 connections in the insular cortex of the rat. *J. Comp. Neurol.* 311, 1–16.  
688 <https://doi.org/10.1002/cne.903110102>
- 689 Beck, P.D., Pospichal, M.W., Kaas, J.H., 1996. Topography, architecture, and connections of  
690 somatosensory cortex in opossums: Evidence for five somatosensory areas. *J. Comp.*  
691 *Neurol.* 366, 109–133. [https://doi.org/10.1002/\(SICI\)1096-](https://doi.org/10.1002/(SICI)1096-9861(19960226)366:1<109::AID-CNE8>3.0.CO;2-7)  
692 [9861\(19960226\)366:1<109::AID-CNE8>3.0.CO;2-7](https://doi.org/10.1002/(SICI)1096-9861(19960226)366:1<109::AID-CNE8>3.0.CO;2-7)
- 693 Beier, K.T., Steinberg, E.E., DeLoach, K.E., Xie, S., Miyamichi, K., Schwarz, L., Gao, X.J.,  
694 Kremer, E.J., Malenka, R.C., Luo, L., 2015. Circuit Architecture of VTA Dopamine Neurons  
695 Revealed by Systematic Input-Output Mapping. *Cell* 162, 622–634.  
696 <https://doi.org/10.1016/j.cell.2015.07.015>
- 697 Benavidez, N.L., Bienkowski, M.S., Zhu, M., Garcia, L.H., Fayzullina, M., Gao, L., Bowman, I.,  
698 Gou, L., Khanjani, N., Cotter, K.R., Korobkova, L., Becerra, M., Cao, C., Song, M.Y.,  
699 Zhang, B., Yamashita, S., Tugangui, A.J., Zingg, B., Rose, K., Lo, D., Foster, N.N.,  
700 Boesen, T., Mun, H.-S., Aquino, S., Wickersham, I.R., Ascoli, G.A., Hintiryan, H., Dong,  
701 H.-W., 2021. Organization of the inputs and outputs of the mouse superior colliculus. *Nat.*  
702 *Commun.* 12, 4004. <https://doi.org/10.1038/s41467-021-24241-2>



- 703 Beukema, P., Cecil, K.L., Peterson, E., Mann, V.R., Matsushita, M., Takashima, Y., Navlakha, S.,  
704 Barth, A.L., 2018. TrpM8-mediated somatosensation in mouse neocortex. *J. Comp.*  
705 *Neurol.* 526, 1444–1456.
- 706 Bokinić, P., Shahbazian, S., McDougall, S.J., Berning, B.A., Cheng, D., Llewellyn-Smith, I.J.,  
707 Burke, P.G.R., McMullan, S., Mühlhoff, M., Hildebrandt, H., Braet, F., Connor, M.,  
708 Packer, N.H., Goodchild, A.K., 2017. Polysialic Acid Regulates Sympathetic Outflow by  
709 Facilitating Information Transfer within the Nucleus of the Solitary Tract. *J. Neurosci.* 37,  
710 6558–6574. <https://doi.org/10.1523/JNEUROSCI.0200-17.2017>
- 711 Bokinić, P., Zampieri, N., Lewin, G.R., Poulet, J.F., 2018. The neural circuits of thermal  
712 perception. *Curr. Opin. Neurobiol.* 52, 98–106. <https://doi.org/10.1016/j.conb.2018.04.006>
- 713 Catania, K.C., Collins, C.E., Kaas, J.H., 2000. Organization of sensory cortex in the East African  
714 hedgehog (*Atelerix albiventris*). *J. Comp. Neurol.* 421, 256–274.  
715 [https://doi.org/10.1002/\(SICI\)1096-9861\(20000529\)421:2<256::AID-CNE10>3.0.CO;2-Y](https://doi.org/10.1002/(SICI)1096-9861(20000529)421:2<256::AID-CNE10>3.0.CO;2-Y)
- 716 Cechetto, D.F., Saper, C.B., 1987. Evidence for a viscerotopic sensory representation in the  
717 cortex and thalamus in the rat. *J. Comp. Neurol.* 262, 27–45.  
718 <https://doi.org/10.1002/cne.902620104>
- 719 Chen, S., Aston-Jones, G., 1995. Evidence that cholera toxin B subunit (CTb) can be avidly taken  
720 up and transported by fibers of passage. *Brain Res.* 674, 107–111.  
721 [https://doi.org/10.1016/0006-8993\(95\)00020-Q](https://doi.org/10.1016/0006-8993(95)00020-Q)
- 722 Chen, T.-W., Wardill, T.J., Sun, Y., Pulver, S.R., Renninger, S.L., Baohan, A., Schreiter, E.R.,  
723 Kerr, R.A., Orger, M.B., Jayaraman, V., Looger, L.L., Svoboda, K., Kim, D.S., 2013.  
724 Ultrasensitive fluorescent proteins for imaging neuronal activity. *Nature* 499, 295–300.  
725 <https://doi.org/10.1038/nature12354>
- 726 Craig, A.D., Bushnell, M.C., Zhang, E.T., Blomqvist, A., 1994. A thalamic nucleus specific for pain  
727 and temperature sensation. *Nature* 372, 770–773. <https://doi.org/10.1038/372770a0>

- 728 Craig, A.D., Chen, K., Bandy, D., Reiman, E.M., 2000. Thermosensory activation of insular cortex.  
729 Nat. Neurosci. 3, 184–190. <https://doi.org/10.1038/72131>
- 730 Dana, H., Chen, T.-W., Hu, A., Shields, B.C., Guo, C., Looger, L.L., Kim, D.S., Svoboda, K., 2014.  
731 Thy1-GCaMP6 transgenic mice for neuronal population imaging in vivo. PloS One 9,  
732 e108697.
- 733 Dempsey, B., Le, S., Turner, A., Bokiniec, P., Ramadas, R., Bjaalie, J.G., Menuet, C., Neve, R.,  
734 Allen, A.M., Goodchild, A.K., McMullan, S., 2017. Mapping and Analysis of the  
735 Connectome of Sympathetic Premotor Neurons in the Rostral Ventrolateral Medulla of the  
736 Rat Using a Volumetric Brain Atlas. Front. Neural Circuits 11.  
737 <https://doi.org/10.3389/fncir.2017.00009>
- 738 Dempsey, B., Sungeelee, S., Bokiniec, P., Chettouh, Z., Diem, S., Autran, S., Harrell, E.R.,  
739 Poulet, J.F., Birchmeier, C., Carey, H., 2021. A medullary centre for lapping in mice. Nat.  
740 Commun. 12, 1–12.
- 741 Do, J.P., Xu, M., Lee, S.-H., Chang, W.-C., Zhang, S., Chung, S., Yung, T.J., Fan, J.L., Miyamichi,  
742 K., Luo, L., Dan, Y., 2016. Cell type-specific long-range connections of basal forebrain  
743 circuit. eLife 5, e13214. <https://doi.org/10.7554/eLife.13214>
- 744 Fabri, M., Burton, H., 1991a. Ipsilateral cortical connections of primary somatic sensory cortex in  
745 rats. J. Comp. Neurol. 311, 405–424. <https://doi.org/10.1002/cne.903110310>
- 746 Fabri, M., Burton, H., 1991b. Topography of connections between primary somatosensory cortex  
747 and posterior complex in rat: a multiple fluorescent tracer study. Brain Res. 538, 351–357.  
748 [https://doi.org/10.1016/0006-8993\(91\)90455-5](https://doi.org/10.1016/0006-8993(91)90455-5)
- 749 Felleman, D.J., Van Essen, D.C., 1991. Distributed hierarchical processing in the primate cerebral  
750 cortex. Cereb. Cortex N. Y. NY 1991 1, 1–47.
- 751 Fürth, D., Vaissièrè, T., Tzortzi, O., Xuan, Y., Märtin, A., Lazaridis, I., Spigolon, G., Fisone, G.,  
752 Tomer, R., Deisseroth, K., 2018. An interactive framework for whole-brain maps at cellular  
753 resolution. Nat. Neurosci. 21, 139–149.

- 754 Gămănuț, R., Kennedy, H., Toroczka, Z., Ercsey-Ravasz, M., Van Essen, D.C., Knoblauch, K.,  
755 Burkhalter, A., 2018. The Mouse Cortical Connectome, Characterized by an Ultra-Dense  
756 Cortical Graph, Maintains Specificity by Distinct Connectivity Profiles. *Neuron* 97, 698-  
757 715.e10. <https://doi.org/10.1016/j.neuron.2017.12.037>
- 758 Gauriau, C., 2004. Posterior Triangular Thalamic Neurons Convey Nociceptive Messages to the  
759 Secondary Somatosensory and Insular Cortices in the Rat. *J. Neurosci.* 24, 752–761.  
760 <https://doi.org/10.1523/JNEUROSCI.3272-03.2004>
- 761 Gauriau, C., Bernard, J.-F., 2004. A comparative reappraisal of projections from the superficial  
762 laminae of the dorsal horn in the rat: The forebrain. *J. Comp. Neurol.* 468, 24–56.  
763 <https://doi.org/10.1002/cne.10873>
- 764 Gehrlach, D.A., Weiland, C., Gaitanos, T.N., Cho, E., Klein, A.S., Hennrich, A.A., Conzelmann,  
765 K.-K., Gogolla, N., 2020. A whole-brain connectivity map of mouse insular cortex. *eLife* 9,  
766 e55585. <https://doi.org/10.7554/eLife.55585>
- 767 Gogolla, N., 2017. The insular cortex. *Curr. Biol.* 27, R580–R586.  
768 <https://doi.org/10.1016/j.cub.2017.05.010>
- 769 Gogolla, N., Takesian, A.E., Feng, G., Fagiolini, M., Hensch, T.K., 2014. Sensory integration in  
770 mouse insular cortex reflects GABA circuit maturation. *Neuron* 83, 894–905.  
771 <https://doi.org/10.1016/j.neuron.2014.06.033>
- 772 Guenthner, C.J., Miyamichi, K., Yang, H.H., Heller, H.C., Luo, L., 2013. Permanent Genetic  
773 Access to Transiently Active Neurons via TRAP: Targeted Recombination in Active  
774 Populations. *Neuron* 78, 773–784. <https://doi.org/10.1016/j.neuron.2013.03.025>
- 775 Guldin, W.O., Markowitsch, H.J., 1983. Cortical and thalamic afferent connections of the insular  
776 and adjacent cortex of the rat. *J. Comp. Neurol.* 215, 135–153.  
777 <https://doi.org/10.1002/cne.902150203>

- 778 Hellon, R.F., Misra, N.K., Provins, K.A., 1973. Neurones in the somatosensory cortex of the rat  
779 responding to scrotal skin temperature changes. *J. Physiol.* 232, 401–411.  
780 <https://doi.org/10.1113/jphysiol.1973.sp010277>
- 781 Kimura, A., Imbe, H., Donishi, T., 2010. Efferent connections of an auditory area in the caudal  
782 insular cortex of the rat: anatomical nodes for cortical streams of auditory processing and  
783 cross-modal sensory interactions. *Neuroscience* 166, 1140–1157.  
784 <https://doi.org/10.1016/j.neuroscience.2010.01.032>
- 785 Knowland, D., Lilascharoen, V., Pacia, C.P., Shin, S., Wang, E.H.-J., Lim, B.K., 2017. Distinct  
786 ventral pallidal neural populations mediate separate symptoms of depression. *Cell* 170,  
787 284-297. e18.
- 788 Krubitzer, L., Clarey, J., Tweedale, R., Elston, G., Calford, M., 1995. A redefinition of  
789 somatosensory areas in the lateral sulcus of macaque monkeys. *J. Neurosci.* 15, 3821–  
790 3839. <https://doi.org/10.1523/JNEUROSCI.15-05-03821.1995>
- 791 Krubitzer, L., Kaas, J., 1990. The organization and connections of somatosensory cortex in  
792 marmosets. *J. Neurosci.* 10, 952–974. [https://doi.org/10.1523/JNEUROSCI.10-03-](https://doi.org/10.1523/JNEUROSCI.10-03-00952.1990)  
793 [00952.1990](https://doi.org/10.1523/JNEUROSCI.10-03-00952.1990)
- 794 Krubitzer, L.A., Sesma, M.A., Kaas, J.H., 1986. Microelectrode maps, myeloarchitecture, and  
795 cortical connections of three somatotopically organized representations of the body  
796 surface in the parietal cortex of squirrels. *J. Comp. Neurol.* 250, 403–430.  
797 <https://doi.org/10.1002/cne.902500402>
- 798 Lerner, T.N., Shilyansky, C., Davidson, T.J., Evans, K.E., Beier, K.T., Zalocusky, K.A., Crow, A.K.,  
799 Malenka, R.C., Luo, L., Tomer, R., 2015. Intact-brain analyses reveal distinct information  
800 carried by SNc dopamine subcircuits. *Cell* 162, 635–647.
- 801 Madden, C.J., Morrison, S.F., 2019. Central nervous system circuits that control body  
802 temperature. *Neurosci. Lett.* 696, 225–232. <https://doi.org/10.1016/j.neulet.2018.11.027>

803 Madisen, L., Zwingman, T.A., Sunkin, S.M., Oh, S.W., Zariwala, H.A., Gu, H., Ng, L.L., Palmiter,  
804 R.D., Hawrylycz, M.J., Jones, A.R., Lein, E.S., Zeng, H., 2010. A robust and high-  
805 throughput Cre reporting and characterization system for the whole mouse brain. *Nat.*  
806 *Neurosci.* 13, 133–140. <https://doi.org/10.1038/nn.2467>

807 Maffei, A., Haley, M., Fontanini, A., 2012. Neural processing of gustatory information in insular  
808 circuits. *Curr. Opin. Neurobiol.* 22, 709–716. <https://doi.org/10.1016/j.conb.2012.04.001>

809 Marshel, J.H., Mori, T., Nielsen, K.J., Callaway, E.M., 2010. Targeting Single Neuronal Networks  
810 for Gene Expression and Cell Labeling In Vivo. *Neuron* 67, 562–574.  
811 <https://doi.org/10.1016/j.neuron.2010.08.001>

812 Mathiasen, M.L., Hansen, L., Witter, M.P., 2015. Insular projections to the parahippocampal  
813 region in the rat: Insular-Parahippocampal Projections. *J. Comp. Neurol.* 523, 1379–1398.  
814 <https://doi.org/10.1002/cne.23742>

815 McDonald, A.J., Jackson, T.R., 1987. Amygdaloid connections with posterior insular and temporal  
816 cortical areas in the rat. *J. Comp. Neurol.* 262, 59–77.  
817 <https://doi.org/10.1002/cne.902620106>

818 Milenkovic, N., Zhao, W.-J., Walcher, J., Albert, T., Siemens, J., Lewin, G.R., Poulet, J.F.A., 2014.  
819 A somatosensory circuit for cooling perception in mice. *Nat. Neurosci.* 17, 1560–1566.  
820 <https://doi.org/10.1038/nn.3828>

821 Niedworok, C.J., Brown, A.P., Cardoso, M.J., Osten, P., Ourselin, S., Modat, M., Margrie, T.W.,  
822 2016. aMAP is a validated pipeline for registration and segmentation of high-resolution  
823 mouse brain data. *Nat. Commun.* 7, 1–9.

824 Nishimura, M., Sawatari, H., Takemoto, M., Song, W.-J., 2015. Identification of the  
825 somatosensory parietal ventral area and overlap of the somatosensory and auditory  
826 cortices in mice. *Neurosci. Res.* 99, 55–61. <https://doi.org/10.1016/j.neures.2015.06.001>

827 Oh, S.W., Harris, J.A., Ng, L., Winslow, B., Cain, N., Mihalas, S., Wang, Q., Lau, C., Kuan, L.,  
828 Henry, A.M., Mortrud, M.T., Ouellette, B., Nguyen, T.N., Sorensen, S.A., Slaughterbeck,

829 C.R., Wakeman, W., Li, Y., Feng, D., Ho, A., Nicholas, E., Hirokawa, K.E., Bohn, P.,  
830 Joines, K.M., Peng, H., Hawrylycz, M.J., Phillips, J.W., Hohmann, J.G., Wohnoutka, P.,  
831 Gerfen, C.R., Koch, C., Bernard, A., Dang, C., Jones, A.R., Zeng, H., 2014. A mesoscale  
832 connectome of the mouse brain. *Nature* 508, 207–214.  
833 <https://doi.org/10.1038/nature13186>

834 Pallast, N., Wieters, F., Fink, G.R., Aswendt, M., 2019. Atlas-based imaging data analysis tool for  
835 quantitative mouse brain histology (AIDAhisto). *J. Neurosci. Methods* 326, 108394.  
836 <https://doi.org/10.1016/j.jneumeth.2019.108394>

837 Paricio-Montesinos, R., Schwaller, F., Udhayachandran, A., Rau, F., Walcher, J., Evangelista, R.,  
838 Vriens, J., Voets, T., Poulet, J.F.A., Lewin, G.R., 2020. The Sensory Coding of Warm  
839 Perception. *Neuron* 106, 830–841.e3. <https://doi.org/10.1016/j.neuron.2020.02.035>

840 Penfield, W., Faulk, M.E., 1955. The insular: further observations on its function. *Brain* 78, 445–  
841 470. <https://doi.org/10.1093/brain/78.4.445>

842 Pollak Dorocic, I., Fürth, D., Xuan, Y., Johansson, Y., Pozzi, L., Silberberg, G., Carlén, M., Meletis,  
843 K., 2014. A Whole-Brain Atlas of Inputs to Serotonergic Neurons of the Dorsal and Median  
844 Raphe Nuclei. *Neuron* 83, 663–678. <https://doi.org/10.1016/j.neuron.2014.07.002>

845 Puchades, M.A., Csucs, G., Ledergerber, D., Leergaard, T.B., Bjaalie, J.G., 2019. Spatial  
846 registration of serial microscopic brain images to three-dimensional reference atlases with  
847 the QuickNII tool. *PLoS One* 14, e0216796. <https://doi.org/10.1371/journal.pone.0216796>

848 Rancz, E.A., Franks, K.M., Schwarz, M.K., Pichler, B., Schaefer, A.T., Margrie, T.W., 2011.  
849 Transfection via whole-cell recording in vivo: bridging single-cell physiology, genetics and  
850 connectomics. *Nat. Neurosci.* 14, 527–532. <https://doi.org/10.1038/nn.2765>

851 Remple, M.S., Henry, E.C., Catania, K.C., 2003. Organization of somatosensory cortex in the  
852 laboratory rat (*Rattus norvegicus*): Evidence for two lateral areas joined at the  
853 representation of the teeth. *J. Comp. Neurol.* 467, 105–118.  
854 <https://doi.org/10.1002/cne.10909>

- 855 Rodgers, K.M., Benison, A.M., Klein, A., Barth, D.S., 2008. Auditory, somatosensory, and  
856 multisensory insular cortex in the rat. *Cereb. Cortex* 18, 2941–2951.
- 857 Sakurai, K., Zhao, S., Takatoh, J., Rodriguez, E., Lu, J., Leavitt, A.D., Fu, M., Han, B.-X., Wang,  
858 F., 2016. Capturing and Manipulating Activated Neuronal Ensembles with CANE  
859 Delineates a Hypothalamic Social-Fear Circuit. *Neuron* 92, 739–753.  
860 <https://doi.org/10.1016/j.neuron.2016.10.015>
- 861 Saleeba, C., Dempsey, B., Le, S., Goodchild, A., McMullan, S., 2019. A Student’s Guide to Neural  
862 Circuit Tracing. *Front. Neurosci.* 13, 897. <https://doi.org/10.3389/fnins.2019.00897>
- 863 Sawatari, H., Tanaka, Y., Takemoto, M., Nishimura, M., Hasegawa, K., Saitoh, K., Song, W.-J.,  
864 2011. Identification and characterization of an insular auditory field in mice. *Eur. J.*  
865 *Neurosci.* 34, 1944–1952. <https://doi.org/10.1111/j.1460-9568.2011.07926.x>
- 866 Schiff, H., Bouhuis, A.L., Yu, K., Penzo, M.A., Li, H., He, M., Li, B., 2017. An insula-central  
867 amygdala circuit for behavioral inhibition. *bioRxiv* 156216.
- 868 Schindelin, J., Arganda-Carreras, I., Frise, E., Kaynig, V., Longair, M., Pietzsch, T., Preibisch, S.,  
869 Rueden, C., Saalfeld, S., Schmid, B., Tinevez, J.-Y., White, D.J., Hartenstein, V., Eliceiri,  
870 K., Tomancak, P., Cardona, A., 2012. Fiji: an open-source platform for biological-image  
871 analysis. *Nat. Methods* 9, 676–682. <https://doi.org/10.1038/nmeth.2019>
- 872 Shi, C.-J., Cassell, M.D., 1998a. Cascade projections from somatosensory cortex to the rat  
873 basolateral amygdala via the parietal insular cortex. *J. Comp. Neurol.* 399, 469–491.  
874 [https://doi.org/10.1002/\(SICI\)1096-9861\(19981005\)399:4<469::AID-CNE3>3.0.CO;2-#](https://doi.org/10.1002/(SICI)1096-9861(19981005)399:4<469::AID-CNE3>3.0.CO;2-#)
- 875 Shi, C.-J., Cassell, M.D., 1998b. Cortical, thalamic, and amygdaloid connections of the anterior  
876 and posterior insular cortices. *J. Comp. Neurol.* 399, 440–468.  
877 [https://doi.org/10.1002/\(SICI\)1096-9861\(19981005\)399:4<440::AID-CNE2>3.0.CO;2-1](https://doi.org/10.1002/(SICI)1096-9861(19981005)399:4<440::AID-CNE2>3.0.CO;2-1)
- 878 Tervo, D.G.R., Hwang, B.-Y., Viswanathan, S., Gaj, T., Lavzin, M., Ritola, K.D., Lindo, S., Michael,  
879 S., Kuleshova, E., Ojala, D., Huang, C.-C., Gerfen, C.R., Schiller, J., Dudman, J.T.,  
880 Hantman, A.W., Looger, L.L., Schaffer, D.V., Karpova, A.Y., 2016. A Designer AAV

- 881 Variant Permits Efficient Retrograde Access to Projection Neurons. *Neuron* 92, 372–382.  
882 <https://doi.org/10.1016/j.neuron.2016.09.021>
- 883 Tsuboi, Y., Iwata, K., Muramatsu, H., Yagi, J., Inomata, Y., Sumino, R., 1993. Response  
884 properties of primary somatosensory cortical neurons responsive to cold stimulation of the  
885 facial skin and oral mucous membrane. *Brain Res.* 613, 193–202.  
886 [https://doi.org/10.1016/0006-8993\(93\)90899-X](https://doi.org/10.1016/0006-8993(93)90899-X)
- 887 Ugolini, G., Kuypers, H.G.J.M., Simmons, A., 1987. Retrograde transneuronal transfer of Herpes  
888 simplex virus type 1 (HSV 1) from motoneurons. *Brain Res.* 422, 242–256.  
889 [https://doi.org/10.1016/0006-8993\(87\)90931-0](https://doi.org/10.1016/0006-8993(87)90931-0)
- 890 Vestergaard, M., Carta, M., Poulet, J.F.A., 2022. The cellular coding of temperature in the  
891 mammalian cortex. *bioRxiv* 2022.02.21.481299.  
892 <https://doi.org/10.1101/2022.02.21.481299>
- 893 Viswanathan, S., Williams, M.E., Bloss, E.B., Stasevich, T.J., Speer, C.M., Nern, A., Pfeiffer, B.D.,  
894 Hooks, B.M., Li, W.-P., English, B.P., 2015. High-performance probes for light and  
895 electron microscopy. *Nat. Methods* 12, 568–576.
- 896 Wall, N.R., Neumann, P.A., Beier, K.T., Mokhtari, A.K., Luo, L., Malenka, R.C., 2019.  
897 Complementary Genetic Targeting and Monosynaptic Input Mapping Reveal Recruitment  
898 and Refinement of Distributed Corticostriatal Ensembles by Cocaine. *Neuron* 104, 916-  
899 930.e5. <https://doi.org/10.1016/j.neuron.2019.10.032>
- 900 Wang, Q., Ding, S.-L., Li, Y., Royall, J., Feng, D., Lesnar, P., Graddis, N., Naeemi, M., Facer, B.,  
901 Ho, A., Dolbeare, T., Blanchard, B., Dee, N., Wakeman, W., Hirokawa, K.E., Szafer, A.,  
902 Sunkin, S.M., Oh, S.W., Bernard, A., Phillips, J.W., Hawrylycz, M., Koch, C., Zeng, H.,  
903 Harris, J.A., Ng, L., 2020. The Allen Mouse Brain Common Coordinate Framework: A 3D  
904 Reference Atlas. *Cell* 181, 936-953.e20. <https://doi.org/10.1016/j.cell.2020.04.007>
- 905 Wickersham, I.R., Lyon, D.C., Barnard, R.J.O., Mori, T., Finke, S., Conzelmann, K.-K., Young,  
906 J.A.T., Callaway, E.M., 2007. Monosynaptic Restriction of Transsynaptic Tracing from



907 Single, Genetically Targeted Neurons. *Neuron* 53, 639–647.  
908 <https://doi.org/10.1016/j.neuron.2007.01.033>

909 Zakiewicz, I.M., Bjaalie, J.G., Leergaard, T.B., 2014. Brain-wide map of efferent projections from  
910 rat barrel cortex. *Front. Neuroinformatics* 8. <https://doi.org/10.3389/fninf.2014.00005>

911 Zhang, M., Kwon, S.E., Ben-Johny, M., O'Connor, D.H., Issa, J.B., 2020. Spectral hallmark of  
912 auditory-tactile interactions in the mouse somatosensory cortex. *Commun. Biol.* 3, 1–17.

913 Zhang, S., Xu, M., Chang, W.-C., Ma, C., Do, J.P.H., Jeong, D., Lei, T., Fan, J.L., Dan, Y., 2016.  
914 Organization of long-range inputs and outputs of frontal cortex for top-down control. *Nat.*  
915 *Neurosci.* 19, 1733–1742.

916 Zingg, B., Hintiryan, H., Gou, L., Song, M.Y., Bay, M., Bienkowski, M.S., Foster, N.N., Yamashita,  
917 S., Bowman, I., Toga, A.W., Dong, H.-W., 2014. Neural Networks of the Mouse Neocortex.  
918 *Cell* 156, 1096–1111. <https://doi.org/10.1016/j.cell.2014.02.023>  
919
